1 **Degradation of miR-466d-3p by JEV NS3 facilitates viral replication and IL-1 $\beta$**   
2 **expression**

3

4 **Short title: miRNA degradation by NS3 of JEV**

5

6 Hui Jiang <sup>a\*</sup>, Caiquan Zhao <sup>a\*</sup>, Zhuofang Bai <sup>a\*</sup>, Yanqing Meng <sup>a</sup>, Tian Qin <sup>a</sup>, Xiao Wang <sup>a</sup>,  
7 Guojun Wang <sup>a</sup>, Min Cui <sup>b</sup>, Jing Ye <sup>b</sup>, Shengbo Cao <sup>b</sup>, Guangpeng Li <sup>a,†</sup>, Yang Yang<sup>a, b†</sup>

8

9 <sup>a</sup>The State Key Laboratory of Reproductive Regulation and Breeding of Grassland Livestock,  
10 School of Life Sciences, Inner Mongolia University, Hohhot, 010070, China

11 <sup>b</sup>The State Key Laboratory of Agricultural Microbiology, College of Veterinary Medicine,  
12 Huazhong Agricultural University, Wuhan, 430070, China

13

14 \*Equal Contributor

15

16 † Corresponding author: Yang Yang, Email: yang55797961@163.com, The State Key  
17 Laboratory of Reproductive Regulation and Breeding of Grassland Livestock, School of Life  
18 Sciences, Inner Mongolia University, Hohhot, 010070, China

19

20 **Author's contributions**

21 YY and GPL conceived the study, HJ, CQZ, ZFB, YQM, TQ and JY performed all  
22 experiments, YY wrote the manuscript, and SBC, GJW and GPL edited, all of the authors  
23 critically reviewed and approved the final manuscript.

24

25

## 26 **Abstract**

27 Previous studies revealed that Japanese encephalitis virus (JEV) infection alters the  
28 expression of miRNA in central nervous system (CNS). However, the mechanism of JEV  
29 infection contributes to the regulation of miRNAs in CNS remain obscure. Here, we found  
30 that a global degradation of mature miRNA in mouse brain and neuroblastoma cells after JEV  
31 infection. In additional, the integrative analysis of miRNAs and mRNAs suggests that those  
32 down-regulated miRNAs are primarily targeted inflammation genes and the miR-466d-3p  
33 target the IL-1 $\beta$  which in the middle of those inflammation genes. Transfection of  
34 miR-466d-3p decreased the IL-1 $\beta$  expression and inhibited the JEV replication in NA cells.  
35 Interestingly, the miR-466d-3p level increased after JEV infection in the presence of  
36 cycloheximide, which indicated that viral protein expression reduces miR-466d-3p.  
37 Therefore, we generated all the JEV coding protein and demonstrated that NS3 is a potent  
38 miRNA suppressor. Furthermore, the NS3 of ZIKA virus, WNV, DENV1 and DENV2 also  
39 decreased the expression of miR-466d-3p. The in vitro unwinding assay demonstrated that the  
40 NS3 could unwind the pre-miR-466d and induce the dysfunction of miRNA. Using  
41 computational models and RNA immunoprecipitation assay, we found that arginine-rich  
42 domains of NS3 are critical for pre-miRNA binding and the degradation of host miRNAs.  
43 Importantly, site-directed mutagenesis of conserved residues revealed that R226G and  
44 R202W significantly reduced the binding affinity and degradation of pre-miR-466d.  
45 Together, these results extend the helicase of Flavivirus function beyond unwinding duplex  
46 RNA to the decay of pre-miRNAs, which provides a new mechanism of NS3 in regulating  
47 miRNA pathways and promoting the neuroinflammation.

48

## 49 **Author Summary**

50 Host miRNAs had been reported to regulate JEV induced inflammation in central nervous  
51 system. We found that the NS3 of JEV can reduce most of host miRNA expression. The  
52 helicase region of the NS3 specifically binds to precursors of miRNA and lead to incorrect  
53 unwinding of precursors of miRNAs which inhibits the function of miRNAs. This observation  
54 leads to two major findings. First, we identified the miR-466d-3p targets to the host IL-1 $\beta$  and  
55 E protein of JEV, and NS3 degrades the miR-466d-3p to promote the brain inflammation and  
56 viral replication. Second, we proved that the arginine on the helicase of NS3 is the main  
57 miRNA binding sites, and the miRNA degradation by NS3 was abolished when the R226 and  
58 R202 were mutated on the NS3. These findings were also confirmed with NS3 of ZIKA virus,  
59 WNV and DENV which could decrease the expression level of miR-466d-3p to enhance the  
60 inflammation. Our study provides new insights into the molecular mechanism of encephalitis  
61 caused by JEV, and reveals several amino acid sites to further attenuate the JEV vaccine.

62

63

## 64 **Introduction**

65 JEV is a single-stranded, positive-sense RNA virus belonging to flavivirus of the Flaviviridae  
66 family. Its genome encodes three structural proteins in order of envelope (E), capsid (C), and  
67 premembrane (PrM), and seven nonstructural (NS) proteins, NS1, NS2A, NS2B, NS3, NS4A,  
68 NS4B, and NS5. During the JEV life cycle in cells, the replication was initiated with the RNA  
69 genome replicase complex, of which NS3 and NS5 are major components required for  
70 genome replication and capping (11). The polyprotein NS3 of JEV belongs to superfamily 2  
71 helicase, which has protease, nucleoside triphosphatase, ATP-dependent RNA helicase  
72 activities and unwind double strands genome during the viral replication (63).

73 JEV is a neurotropic virus causing neuroinflammation and neuronal damage that causes  
74 Japanese encephalitis (JE) (44). In spite of vaccines available control JEV, approximately  
75 67,900 cases of JE are reported around the world per year, half of which were occurred in the  
76 mainland of China (7). Due to the lack of effective anti-viral drug against JEV, the fatality  
77 rate of JE is ~25-32%, and 50% of the survivors suffer from neuropsychiatric sequelae (55).  
78 JEV causes neuroinflammation and neuronal damage in mammalian hosts by modulating  
79 cytokine/chemokine production (10) as well as the activation and migration of neuroglial cells  
80 (12, 19). The production of inflammation cytokine increases microglial activation following  
81 JEV infection, which facilitates outcome of viral pathogenesis and benefit the dissemination  
82 of the virus in the CNS (25, 35). For this reason, most of studies on innate immune response  
83 in the CNS have focused on the molecular components of JEV recognition and signaling  
84 regulator. Recent studies have revealed that the JEV was recognized by the toll-like receptor 7  
85 (TLR7) in neuron cells and TLR3 in microglia cells (28, 47). Following JEV recognition, the  
86 adapter proteins of TLRs are activated and involved myeloid differentiation primary response  
87 88 (MyD88). Furthermore, protein kinases such as kinase B (Akt), phosphoinositide 3-kinase  
88 (PI3K), p38 mitogen-activated protein kinase (p38MAPK) and signal-regulated kinase (ERK)  
89 (18) are triggered by JEV infection. However, the involvement of JEV components in  
90 modulating inflammation response still obscure. To our knowledge, several recent studies  
91 found that ZIKV NS5 facilitates inflammasome to induce IL-1 $\beta$  secretion (66). JEV NS3  
92 interacts with Src protein tyrosine kinase promote inflammatory cytokine secretion (50).

93 DENV NS1 has been reported to interact with STAT3 that enhance the secretion of TNF- $\alpha$   
94 and IL-6 (18). Hence, the non-structural proteins of Flaviviridae play an important role in  
95 inflammation response, but the specific signaling pathway and target sites of JEV  
96 non-structural protein remains unknown.

97 Regardless of species of origin, microRNAs (miRNA) are small, noncoding RNAs containing  
98 ~22 nucleotides (nt) that control the posttranscriptional gene regulation by targeting mRNAs.

99 In animal cell, following transcription by RNA polymerase II (RNA Pol II), the RNA  
100 polymerase III (RNA Pol III) Droscha in the nucleus process the primary transcripts of

101 miRNAs (pri-miRNAs) into ~60-100 nt precursors (pre-miRNAs). The pre-miRNAs are then  
102 shuttled into cytoplasm, and further processed by RNA Pol II Dicer into ~22 nt

103 double-stranded (ds) RNA product containing the mature miRNA guide strand and the  
104 passenger miRNA strand. The mature miRNA is then load into the RNA-induced silencing

105 complex (RISC) and bind 3' untranslated regions (UTRs) of target mRNA, which lead to  
106 translation repression and/or mRNA degradation. Through the repression of target, miRNA

107 modulate a broad range of gene expression programs during development, immunoreaction  
108 and in pathogen infection. Accumulating evidences also suggest abundant of cellular miRNAs

109 involved in multiple stages of the JEV replication cycle. For instance, miR-155, miR-15b  
110 miR-19b and miR-29b are induced and activated innated immune response after JEV

111 infection, respectively (3, 60, 61, 73). Beside JEV infection reduces the expression of  
112 miR-33a and miR-432 to facilitate virus replication (14, 53). Therefore, the regulation of

113 miRNA is important for cell biological process and mRNA homeostasis during the JEV  
114 infection. In contrast to the biosynthetic of miRNA, under physiological or pathological

115 conditions, some of the miRNA decayed rapidly. Most studies on degradation of miRNA  
116 have demonstrated the mechanisms involved sequence organization, ribonuclease activity,

117 transcription rates and energy metabolism. For example, several 3' to 5' or 5' to 3'  
118 miRNA-degrading ribonuclease were found to perform degradation of different miRNA in

119 variety of cell types (9, 30). A sequence target-dependent mechanism has also been identified,  
120 in which cleavage is mediated by miRNA and high complementary interaction, such as viral

121 non-coding transcript (8, 41), miRNA and miRNA hybrid (13) or extent of sequence  
122 complementarity (2). Although the miRNA function has been well defined during the viral

123 replication, the turnover dynamics of miRNA and the mechanisms involved have been poorly  
124 defined.

125 Numerous studies of virus in regulating host miRNA to control cellular protein expression,  
126 suggesting a critical role of host miRNAs in immune evasion and viral replication cycle. Both  
127 DNA and RNA viruses have developed several mechanisms to degrade or promote cellular  
128 miRNA to benefit viral infection and replication. Specifically, herpesvirus saimiri (HVS) and  
129 murine cytomegalovirus (MCMV) directly degrade host miR-27 using a virus encode ncRNA  
130 which contains miR-27 sequence-specific binding site (8, 39). Similarly, human  
131 cytomegalovirus (HCMV) decrease the mature miR-17 and miR-20a using a 15 kb  
132 microRNA (miRNA) decay element in the UL/b' region of the viral genome (37). On the  
133 other hand, vaccine virus (VACV) degrades the host miRNA via adding tails using viral  
134 poly(A) polymerase (4). Furthermore, the Kaposi's sarcoma-associated herpesvirus (KSHV)  
135 repress the MCP1 to facilitate its own miRNA expression (29). Although the direct  
136 interaction between host miRNAs and viral components remain far behind other studies, to  
137 date, there are two approaches to predict RNA and protein interaction. One of the most  
138 cost-effective approaches is computational predicting methods, which could predict  
139 protein-RNA interaction and protein-RNA binding sites. Given the limited accurate of  
140 computational methods, the RNA-protein immunoprecipitation provides a specific and  
141 accurate predication of RNA-protein interaction. Based on those approaches, those would be  
142 especially valuable to mapped miRNA-protein binding sites and characterized biological  
143 function of viral components in viral replication process.

144 In the present study, JEV NS3 has been demonstrated to directly disrupt cellular pre-miRNA  
145 and reduce mature miRNA levels. Through computational and RNA immunoprecipitation  
146 (RIP) analysis, the miRNA binding and turnover of NS3 was found to be arginine-rich  
147 domains dependent, which was determined by R226G and R202W of NS3. In addition, NS3  
148 mediated miRNA degradation is critical in inflammation related pathway, which may  
149 promote an irreversible inflammatory response leading to neuronal cell death. These results  
150 also provide further insight into the role of flavivirus helicase in the regulation of host  
151 miRNA turnover.

## 152 **Results**

### 153 **JEV mediates down regulation of global miRNA in mice nervous system**

154 To examine the host miRNAs expression profiles that regulated by JEV infection, miRNA  
155 microarrays were used to assay host miRNA expression profiles in mice brain with infection  
156 of pathogenic strain JEV (P3). The miRNA expression profiles showed that the abundance of  
157 host miRNAs was altered during JEV infection (Fig. 1A). Notably, the 76.7% of total 41  
158 miRNAs (p-value <0.05 and FC > 2.0) were reduced during JEV infection in mice brain. To  
159 determine whether the global down regulation of endogenous miRNAs was biased in any  
160 way, we used a small RNA deep sequence to analysis the miRNA expression profile of P3  
161 infected NA cells at MOI of 1 and 0.1 for 48 hours (Fig. 1B). This analysis further confirmed  
162 that JEV infection led to global host miRNAs decrease. Furthermore, the virus titer and NS3  
163 expression level of cells infected with P3 at 1 MOI was higher than cell infected with P3 at  
164 0.1 MOI, and 1 MOI infection more significantly decreased miRNA expression than 0.1 MOI  
165 infection, suggesting that the JEV induced the global miRNA decrease is related to JEV  
166 replication (Fig. 1C and D). The miRNA profiles were also confirmed by qRT-PCR analyses  
167 in JEV infected NA, BV2 and bEnd.3 cells (Fig. 1E). The integrative analysis of miRNAs and  
168 mRNAs was used to predict the major target of the decreasing miRNAs. A total of 42  
169 interacting proteins with 177 interactions were retrieved from the STRING database and 8  
170 proteins were segregated to one subgroup, of which were related to immune and inflammation  
171 process (S1 Fig). The result indicated that IL-1 $\beta$  is in the middle of these influential genes and  
172 the miR-466d-3p is the only miRNA that decreased significantly (FC  $\geq$  2.0, p value < 0.01)  
173 which target the IL-1 $\beta$ .

174

### 175 **JEV infection induces incorrect processing of host miRNAs**

176 Interestingly, the mature miRNA sequence-specific reads were determined by deep  
177 sequencing of the 18-24 nt fraction and analyzed by the miRDeep2 module (24), which  
178 revealed that percentage of incorrect sequences in the total reads of miR-466d-3p,  
179 miR-381-3p and miR-466a-3p were increased (S2 Fig). Furthermore, we observed some of  
180 miRNAs from the same precursor were all down-regulated, such as, the miR-466h-3p and

181 miR-466d-3p generated from miR-466d-3p precursor (Fig. 2A), which were both  
182 significantly down-regulated in NA cells (Fig. 2B). Notably, the pre-mir-466d-3p and mature  
183 miR-466d-3p were reduced in a dose dependent, but the pri-miR-466d-3p appeared  
184 unmodified (Fig. 2B). To further examine the miRNA degradation inducing by JEV, the JEV  
185 significantly decrease the abundance of miR-466d-3p that derived from an exogenously  
186 constructed miRNA mimic compared to the medium control in NA cells (Fig. 2C). Therefore,  
187 these experiments indicated that JEV infection decreases the level of pre-miRNA to  
188 downregulate miR-466d-3p expression.

189

### 190 **JEV NS3 mediates degradation of miR-466d-3p in neuronal cells**

191 Expression of the non-structure protein or noncoding sub genomic RNA (sfRNA) of virus is  
192 required for viral pathogenicity which would affect the host miRNAs processing (34). JEV  
193 infection of neuronal cells results in viral gene transcription and subsequently followed by  
194 viral protein translation. The transcriptional inhibitor Favipiravir (T-705) and  $\alpha$ -Amanitin or  
195 the translation inhibitor cycloheximide (CHX) were used to identify the viral components  
196 induced degradation of miR-466d-3p. All early treatments of T-705 and CHX at 12 hours post  
197 infection (hpi) could severely block the JEV replication and inhibit degradation of the  
198 miR-466d-3p in NA cells. In contrast, late treatment of CHX at 42 hpi could block the  
199 degradation of miR-466, but not the treatment of T-705 at 42 hpi (Fig. 3A). Taken together,  
200 these data suggested that the posttranscriptional modification or improper processing of host  
201 miRNAs is dependent on viral protein production or viral protein with host miRNA  
202 interaction in mice neuron cells.

203 Since JEV transcript did not suppress host miRNA, to further determine which viral protein  
204 were sufficient to confer the host miRNA degradation, 8 pcDNA3.1 vector encoding each  
205 structure protein (E, C and PrM) non-structure protein (NS1, NS2, NS3, NS4A, NS4B and  
206 NS5) of JEV were constructed. The miR-466d-3p expression was measured 48 hours post  
207 transfection. Only NS3 induced a significant decrease of mature miR-466d-3p (40% reduction  
208 compare to pcDNA 3.1 control) (Fig. 3B). Several of other non-structure proteins of JEV  
209 have been revolved to associate with NS3 to facilitate the RNA assembling and viral  
210 replication (40, 46). To determine the potential association between other different



211 non-structure proteins of JEV, the co-transfection of NS2B, NS4A and NS5 with NS3 were  
212 determined and there was no significantly different comparing to NS3 individual transfection  
213 group. Moreover, the expression of NS3 in the NA cells also induced a global down  
214 regulation of endogenous miRNAs (Fig. 3C) and the same miRNAs in the Fig 1E were also  
215 confirmed by qRT-PCR (Fig. 3D). We further assessed the effect of JEV and NS3 in the  
216 human neuroblastoma cells (SK-N-SH) to test the regulation of human miRNA by qRT-PCR.  
217 As shown in Fig. 3E, both the JEV infection and the NS3 transfection reduced the miRNA  
218 expression level in SK-N-SH cells.

219 Since the JEV NS3 represented a critical role in turnover of host miRNA, we constructed  
220 pcDNA3.1 vector encoding NS3 plasmids of ZIKA virus, WNV, DENV1, DENV2, CSFV,  
221 BVDV and HCV to identify whether the helicase of other flavivirus could degrade the host  
222 miRNAs. The NS3 of ZIKA virus, WNV, DENV1 and DENV2 induced the decrement of  
223 miR-466d-3p when transfected into NA cells (Fig. 3F). However, transfection with NS3 of  
224 CSFV, BVDV and HCV were not affected the amount of miR-466d-3p. The alignment of  
225 NS3 was revealed that JEV, ZIKA virus, WNV, DENV1 and DENV2 were included in one  
226 subgroup and different from the others (CSFV, BVDV and HCV) (S3 Fig). These results  
227 indicated that the NS3 of Flavivirus decrease the expression level of miR-466d-3p.

228 The hypothesis of miRNA degradation and their mRNA-targeting activities upon NS3  
229 expression is not due to inhibiting the expression of RISC. This was partially confirmed by  
230 qRT-PCR of the major RISC components gene expression, which of them were all  
231 significantly increased after JEV infection (S4 Fig). Furthermore, to explore the possibility  
232 that NS3 interacted with dicer or RISC, the proteins that co-immunoprecipitation with NS3  
233 were analysis with LC-MS (S1 Table). The amino sequence identification showed 209  
234 proteins which score were higher than 90 and rich in several functional categories such as,  
235 heat shock protein, cytoskeletal components, chaperonin protein and TRiC (TCP-1 Ring  
236 Complex). To our knowledge, none of these proteins were correlated with miRNA  
237 degradation process that has been reported previously. Furthermore, transfection with NS3 in  
238 NA cells significantly decrease the amount of miR-466d that derived from an exogenously  
239 constructed miRNA mimic (Fig. 3G), indicating NS3 affect the processing of pre-miRNA or  
240 double-stranded segment of miRNA that is 22 bp.

241

242 **Block miR-466d enhance IL-1 $\beta$  secretion and promote JEV replication**

243 To verify *in silico* analysis of miRNA-mRNA interaction, the level of IL-1 $\beta$  were further  
244 determined in JEV-infected mice brain and cells using ELISA. The results revealed that the  
245 IL-1 $\beta$  level in mice brain was significantly enhanced at 6 dpi (Fig. 4A). In addition, protein of  
246 IL-1 $\beta$  were significantly elevated in the dose-dependent and time-dependent manner in NA,  
247 BV2 and bEnd.3 cells.1 (Fig. 4B).

248 The sequences of miR-466d-3p and its target site in the 3' UTR of IL-1 $\beta$  were aligned using  
249 TargetScan ([http://www.targetscan.org/mmu\\_72/](http://www.targetscan.org/mmu_72/)) (Fig. 4C). To determine whether IL-1 $\beta$   
250 mRNA is indeed target for miR-466d-3p, the expression of IL-1 $\beta$  was examined in BV2 and  
251 NA cells after transfected with miR-466d-3p mimics or miR-466d-3p inhibitors, respectively.  
252 The results shown that overexpression of miR-466d-3p significantly suppressed IL-1 $\beta$  mRNA  
253 and protein levels in BV2 and NA cells, and the similar results were observed in BV2 and NA  
254 cells after infected with JEV or treated with LPS (Fig. 4D-F, top). In contrast, miR-466d-3p  
255 inhibitor was significantly increased IL-1 $\beta$  mRNA expression and protein secretion in BV2  
256 and NA cells, respectively (Fig. 4D-F, bottom). Moreover, the miR-466d-3p expression level  
257 of the cells treated with LPS or poly(I:C) was similar to the medium treated cells and  
258 significantly higher than JEV infected cells. However, the miR-466d-3p mimic could still  
259 inhibit the LPS or poly(I:C) induced IL-1 $\beta$  over-transcription and overexpression, which  
260 indicated that miR-466d-3p is a common regulator of IL-1 $\beta$  not specific to the JEV infection.

261 Interestingly, a miRNA and JEV viral genomic gene comparison analysis indicated that the  
262 miR-466d-3p also targets the coding sequence of JEV E, NS3 and NS5 genomes (Fig. 4C).  
263 There was a substantial reduction of virus titer in the NA cells that were transfected with  
264 miR-466d-3p. Moreover, inhibition of miR-466d-3p leads to an increment of JEV replication  
265 (Fig. 4G). To determine whether the miR-466d-3p direct target the seed sequence of JEV, we  
266 constructed a miR-466d target sites-fused GFP expressing vector which containing 2  
267 miR-466d target seed sequence of JEV NS3 and E. As expected, transfection of miR-466d  
268 mimic resulted in a complete loss fluorescence in miR-466d target sites-fused GFP expression  
269 cells, whereas co-transfection of NS3 significant recovered expression of GFP, suggesting  
270 that NS3 cleave miR-466d to block the miRNA function (Fig. 4H). Thus, these data suggested

271 IL-1 $\beta$  as a possible target of miR-466d-3p which also worked as a negative regulator of JEV  
272 replication.

273

#### 274 **Unwinding of miR-466d-3p by NS3 blocks the silencing function of miRNA**

275 The NS3 of JEV previously has been identified as an RNA helicase that acts by unwinding of  
276 dsRNA (63). The transactivating response RNA-binding protein (TRBP) and Argonaute 2  
277 contain several dsRNA-binding domains, which facilitate the dsRNA fragments into RISC in  
278 order to target mRNA (15, 64). We hypothesized that host pre-miRNAs may also be unwound  
279 into a single strand RNA by NS3, in which the RISC could not recognize the single strand  
280 fragment or target the mRNA. In vitro unwinding assays revealed that a synthesized  
281 pre-miR-466d-3p containing a hairpin structure (Fig. 5A, top) was unwound into a single  
282 strand RNA in a dose dependent manner (from lane 2 to lane 5 of Fig 5B). To determine  
283 whether NS3 can directly unwind miR-466d-3p mimic in addition to endogenous host  
284 miRNAs, using in vitro degradation assay, the synthetic double strand miR-466d-3p mimic  
285 (Fig. 5A, bottom) could also unwind into a single strand by NS3 in a dose dependent manner  
286 (from lane 2 to lane 5 of Fig. 5C).

287 To further examine whether the unwinding miRNA could still transport into RISC and  
288 execute a normal function of RNA silencing with host mRNA. The fragment of unwinding  
289 miR-466d-3p mimic and pre-miR-466d-3p were recycled with Trizol after the in vitro  
290 unwinding assay. After transfection with unwinding miR-466d-3p mimic, the expression level  
291 of mature miR-466d-3p was similar to the NC control group, indicating that the unwinding  
292 miR-466d-3p mimic was unstable in the host cells (Fig. 5D). Notably, we also did not observe  
293 the mRNA expression and protein secretion level of IL-1 $\beta$  decreased after transfection of  
294 unwinding miR-466d-3p mimic with or without JEV infection (Fig. 5E and 5F). Taken  
295 together, these data demonstrate that the NS3 of JEV could facilitate the disfunction of  
296 miR-466d-3p in the host cells.

297

#### 298 **NS3 has specific binding affinity with pre-miRNA**

299 Many VSRs have been reported to block RNAi by binding siRNA or miRNAs (27, 52).  
300 Several ribonucleoproteins performed the post-transcriptional regulatory networks that are

301 mediated by RNA-protein interactions (RPIs), and some computational models were  
302 developed to help identify the RPIs and predicated the RNA and proteins binding sites (36,  
303 38, 45, 62). To test whether the miRNAs binding ability is required for NS3 inducing miRNA  
304 degradation. In the present study, a RPISeq webserver was used to verify those hypotheses  
305 (45). The Random Forest (RF) that calculated by RPISeq of indicated miRNAs between each  
306 nonstructural protein of JEV was used to evaluate the RPI interaction. The probability  
307 threshold of RF used for positive RPIs was higher than 0.5, and only the value of  
308 pre-miRNAs or mature miRNAs that interacted with NS3 were all high than 0.5. The mean  
309 RF of NS3 with pre-miRNA and mature miRNA was 0.675 and 0.69 respectively, and  
310 significantly higher than all the other proteins of JEV (Fig. 6A).

311 To further confirm these *in silico* analysis, an RNA immunoprecipitation (RIP) assay using  
312 flag-fused protein to identify the NS3 and miRNA binding affinity, and the fold enrichment of  
313 non-structure protein over pcDNA 3.1 was used to determine the RIP value (see material and  
314 methods for details). The NS3 has a significantly higher pre-miRNA (i.e., miR-466d-3p,  
315 miR-199a-5p, miR-674-5p, miR-574-5p and miR-467a-3p) binding affinity than pcDNA 3.1.  
316 In contrast to the NS3, the miRNA binding ability of NS4A was similar to the pcDNA 3.1.  
317 However, in contrast to these *in silico* analysis, the RIP assay revealed that the binding ability  
318 of pre-miR-466d-3p on NS3 was more than nonuple higher than miR-466d-3p and there is no  
319 significant binding affinity of NS3 difference between the pcDNA3.1 and the NS4A (Fig.  
320 6B). Furthermore, a CY3 labeled miR-466d-3p mimic revealed that it colocalized with the  
321 NS3 expression in the cytoplasm of NA cells (Fig. 6C). However, the miR-466d-3p mimic  
322 distributed evenly in the NA cells without the expression of NS3. These results indicate that  
323 NS3 specifically binds to pre-miRNA and the binding ability may be essential for miRNA  
324 degradation.

325

### 326 **NS3-mediated the miRNA degradation dependent on arginine rich motifs**

327 Computation methods have been reported to predict the amino acid binding sites of PRIs.  
328 However, sequence-based predictors are usually high in sensitivity but low in specificity;  
329 conversely structure-based predictors tend to have high specificity, but lower sensitivity (38).  
330 In order to combine the advantages of two methods, we used several software to predict RPIs

331 binding sites of NS3. The aaRNA web serve that quantified the contribution of both  
332 sequence- and structure-based features, the score of RNA and protein binding specificity was  
333 represented as binary propensity (from 0 to 1) (38). The RNA binding sites on NS3 of JEV  
334 was analyzed using a PDB format of NS3 (PDB entry 2Z83) with aaRNA, 4 arginine (R202,  
335 R226, R388 or R464 respectively) on the NS3 has a higher score ( $> 0.5$ ) than other amino  
336 acid sites (S5 Fig). Furthermore, using two web servers called Pprint and PRIdictor  
337 (Protein-RNA Interaction predictor) predicted the amino acid binding sites of PRIs (36, 62),  
338 the R202, R226 or R464 that located in the helicase region of NS3 has high miRNA binding  
339 ability (S6 Fig and S7 Fig). Similarly, previous studies have reported the arginine as a  
340 stronger RNA binding amino acids than others (31). Interestingly, almost all 202, 226, 388 or  
341 464 AA sites on the NS3 of flavivirus are arginine but not the hepacivirus or pestivirus. Thus,  
342 this sequence alignment confirms the Fig. 3F that only the flavivirus reduce the miRNA  
343 expression. When these arginine sites were mutated into other amino acids, the binary  
344 propensity or RF value of R202W, R226G and R464Q were all also drop sharply (Fig. 7A  
345 and 7B). To further confirm these *in silico* analysis, we constructed 3 substitution mutant  
346 vectors of NS3 named as R202W, R226G and R464Q. To investigate the role of miRNA  
347 binding affinity in NS3 inducing miRNA turnover, RIP analysis and miRNA expression level  
348 were detected in NA cells with these three mutants or parent plasmids of NS3. As shown in  
349 Fig. 7C, comparing with the pcDNA 3.1, the mutants of NS3 also specifically bind to  
350 pre-miR-466d-3p, and the pre-miR-466d-3p binding ability of R226G and R202W were  
351 significantly lower than wild type NS3 (Fig. 7C). Furthermore, the R226G and R202W  
352 significantly reduce the degradation of miR-466d-3p, except for R464Q (Fig. 7D). Thus, the  
353 202 and 226 arginine of the NS3 contributes to pre-miRNA binding and promotes miRNA  
354 degradation.

355

## 356 Discussion

357 Increasing studies have shown that miRNAs play an important role in the replication and  
358 propagation of viruses, including defense of pathogenic viral infections or promotion of viral

359 replication through complex regulatory pathways (26). In the early steps of viral infection,  
360 innate viral detected sensors of host cells, such as pathogen recognition receptors (PRRs),  
361 recognize a large spectrum of pathogens and initiated a downstream antiviral pathway  
362 activates that include miRNAs (65). However, the defense function of host miRNAs can be  
363 counteracted by viral suppressors of RNA silencing (VSRs) that inhibit host antiviral  
364 responses by interacting with the critical components of cellular RNA silencing machinery or  
365 direct participate the host RNA degradation (6, 26). Recently, an increasing number of studies  
366 have found that JEV infection were capable of regulating functional miRNAs (3, 14, 53, 60,  
367 61, 73). Although plenty of works were examined the host biogenesis regulating by miRNA  
368 during the viral infection process, relatively little was known about regulation of miRNA by  
369 JEV. Given the importance of miRNA in establishing infection of JEV, our research was aim  
370 to explore the interplay between the JEV and host miRNAs.

371 An intriguing aspect of this study is that the JEV globally decrease the host miRNA and  
372 independent on Dicer or RISC. We demonstrated that the JEV NS3 could unwind the  
373 pre-miR-466d and induce the disfunction of miR-466d-3p. We also observed that the  
374 decrement of miR-466d-3p could enhance the JEV replication. Together, these results  
375 suggested a role of the miRNA degradation in enhancing JEV replication. Similarly, poly(A)  
376 polymerase of vaccina virus (VACV) and 3'UTR of the murine cytomegalovirus degrades the  
377 host miRNA via different mechanisms (4, 39). Although this is the first report of a link  
378 between the host miRNA degradation and JEV infection, several studies have reported the  
379 role of miRNA machineries in the replication of flavivirus, especially dengue virus and  
380 Kunjin virus (34, 43). Some analogous systems in degradomes of bacterial and exosomes of  
381 eukaryotes are associated with RNA helicases to perform the RNA degradation (22, 49).  
382 Hence, the helicase of the JEV seem to be involved in degrading the host miRNA.

383 Why would JEV has evolved a miRNA degradation processing during viral infection in the  
384 CNS? There are two possibility why the JEV infection induced global degradation of host  
385 miRNA might promote viral infection and replication. First, the host cell encoding miRNA  
386 binds to miRNA-binding sites of viral genomes to influence viral function (56, 72).  
387 Consistent with this is our observation that restoring miR-466d-3p expression during the JEV  
388 infection reduces viral replication. Conversely, the viral induced degradation of host miRNA

389 leads to block the cleavage of viral genome and viral protein. Second, changes in host miRNA  
390 expression could also lead to enhance antiviral effector resulting in reducing viral replication  
391 (54, 61). However, some viral infections mediate degradation of host miRNAs leading to  
392 downstream changes in host transcriptome that can be benefit virus replication and  
393 pathogenicity (4). These hypotheses were also confirmed with NS3 of other Flavivirus,  
394 including ZIKA could decrease the expression level of miR-466d-3p to enhance the  
395 inflammation.

396 Eubacteria, Archaea, and eukaryotes have developed dedicated pathways and complexes to  
397 check the accuracy of RNAs and feed undesired RNA into exoribonuclease that degrade  
398 RNA. Furthermore, these complexes usually contain adaptor proteins such as RraA (a  
399 regulator of RNase E and DEAD-box helicases), RhlB (a DEAD-box RNA helicase) (49),  
400 Ski2-like RNA helicases (22, 32) and Suv3 RNA helicase (20). In addition to the RNA  
401 degradation, the UPF1 helicase can dissociate miRNAs from their mRNA targets and promote  
402 the miRNAs degradation by Tudor-staphylococcal/micrococcal-like nuclease (TSN) (21). The  
403 P68 helicase promote unwinding of the human let-7 microRNA precursor duplex, which help  
404 let-7 microRNA load into the silencing complex. p72 (DDX17) interact with the  
405 Drosha-containing Microprocessor complex and facilitate the processing of a subset of  
406 pri-miRNAs in the nucleus and miRNA-guided mRNA cleavage (51). Although host helicase  
407 may initially seem to benefit only the cells processing and immune system, multiple studies  
408 have shown that viral helicase promote viral replication and disrupt immune system. The NS3  
409 of flavivirus are capable of unwinding both the DNA and the RNA that are not of the viral  
410 own origin (16, 63). Similar, we observed NS3 of JEV could reduce exogenously constructed  
411 ds-miRNA mimic and disable the miRNA mimic.

412 Furthermore, it has been shown that some single-amino-acid mutation in R538, R225 and  
413 R268 of DENV, which affect the replication of DENV (17, 58). Another study report that the  
414 Asp-285-to-Ala substitution of the JEV NS3 protein abolished the ATPase and RNA helicase  
415 activities (63). Furthermore, the helicase domains of NS3 alone is known to induce cell  
416 apoptosis in neuron cells (68, 71). These findings suggested that NS3, particularly helicase  
417 domain, contributes to the adaptation of flavivirus for efficient replication. Thus, to  
418 investigate the details of the NS3 involvement in miRNA degradation, using miRNA deep

419 sequence, we analysis the subtype sequence of mir-466d during the JEV infection and NS3  
420 over expression, in which the percentage of incorrect splicing products of mature miRNA was  
421 higher than normal. Furthermore, the in vitro unwinding assay demonstrated that the NS3  
422 could unwinding the pre-miR-466d and induce the disfunction of miRNA. However, the  
423 molecular mechanism of miRNA degradation after unwinding by NS3 need to be clarified in  
424 next step experiment.

425 In the present study, we proved that the arginine of NS3 are critical for host pre-miRNA  
426 binding and promote the global host miRNA turnover. We constructed 3 arginine variants of  
427 NS3 that have single amino acid substitutions on R202W, R226G and R464Q, which were  
428 reduced pre-miRNA binding affinity of NS3 and the degradation of miRNA was almost  
429 abrogated. Interestingly, these sites are all located in the helicase region of NS3, which from  
430 protein sequence of NS3 163 to 619. Similar to our findings, a number of proteins containing  
431 arginine-rich motifs (ARMs) are known to bind RNA and are involved in regulating RNA  
432 processing in viruses and cells. Such as the ARM of lambdoid bacteriophage N protein or  
433 HIV-1 Rev protein bind RNAs and regulate the RNA transport and splicing (23, 57). In  
434 addition, four single amino substitution of arginine on HIV-1 Rev protein strongly decrease  
435 their RNA binding ability. In brief, these results extend the helicase of Flavivirus function  
436 beyond unwinding duplex RNA to the decay of pre-miRNAs, which was provided a new  
437 mechanism of helicases in regulating miRNA pathways. Our results suggested that helicase of  
438 flavivirus may have the capacity to regulate various cellular miRNAs, which would be a part  
439 of a general viral response to overcome host defense mechanisms.

440

441

442



## 443 **Materials and Methods**

### 444 **Cell and viruses**

445 The mouse microglia cell line BV-2, the mouse neuroblastoma cell line NA and mouse brain  
446 endothelial cell line bEnd.3 were gift from Huazhong Agricultural University which  
447 maintained in Roswell Park Memorial Institute (RPMI) 1640 medium (Thermo-Fisher, USA)  
448 supplemented with 10% fetal bovine serum (FBS; Gibco, Carlsbad, CA, USA) at 37°C in 5%  
449 CO<sub>2</sub>. The baby hamster Syrian kidney cells line BHK-21 was gift from Huazhong  
450 Agricultural University which cultured in Dulbecco's modified Eagle's medium (DMEM,  
451 High glucose, Thermo-Fisher, USA) containing 10% FBS. The P3 strain of JEV (Japanese  
452 encephalitis virus) was propagated in suckling BALB/c mice (purchased from Vital River  
453 Laboratories, China) as previously (37). Briefly, one-day-old suckling mice were inoculated  
454 with 10 µl of viral inoculum by the intracerebral (i.c.) route. When moribund, mice were  
455 euthanized and brains removed. A 10% (w/v) suspension was prepared by homogenizing the  
456 brain in DMEM and centrifuged at 10,000 g for 5 min to remove cellular debris. The brain  
457 suspension was filtered through 0.22 µm-pore-size sterile filters (Millipore, USA) and sub  
458 packaged at -80°C until further use.

### 459 **RNA sequencing**

460 Total RNA was extracted from culture NA using the Total RNA Extractor Kit (B511311,  
461 Sangon) according to the protocols. A total of 2µg RNA from each sample was used for  
462 library preparation according to the manufacturer's instructions of the VAHTSTM  
463 mRNA-seq V2 Library Prep Kit for Illumina®. The library fragments were purified with  
464 AMPure XP system (Beckman Coulter, Beverly, USA). PCR products were purified  
465 (AMPure XP system) and library quality was assessed on the Agilent Bioanalyzer 2100  
466 system. The libraries were then quantified and pooled. Paired-end sequencing of the library  
467 was performed on the HiSeq XTen sequencers (Illumina, San Diego, CA). FastQC (version  
468 0.11.2) was used for evaluating the quality of sequenced data. Raw reads were filtered by  
469 Trimmomatic (version 0.36) according to protocol. And the remaining clean data was used for  
470 further analysis. Gene expression values of the transcripts were computed by StringTie  
471 (version 1.3.3b). Principal Component Analysis (PCA) and Principal co-ordinates analysis

472 (PCoA) were performed to reflect the distance and difference between samples. The TPM  
473 (Transcripts Per Million), eliminates the influence of gene lengths and sequencing  
474 discrepancies to enable direct comparison of gene expression between samples. DESeq2  
475 (version 1.12.4) was used to determine differentially expressed genes (DEGs) between two  
476 samples.

#### 477 **Plaque assay**

478 JEV was titrated on BHK-21 cells line by viral plaque formation assay as previously (14). A  
479 monolayer of BHK cells was co-cultured with JEV (a serial 10-fold dilution prepared in  
480 DMEM without FBS) at 37°C. After 2 h incubation, the DMEM containing 3% FBS and 4%  
481 sodium carboxymethyl cellulose (CMC) (Sigma) were added to the cells and cultured for 5  
482 days. Until the appearance of visible plaques, the cells were fixed with 10% formaldehyde  
483 overnight, followed by staining with crystal violet for 2 h. Visible plaques were counted and  
484 the viral titers were calculated. All data were expressed as means of triplicate samples.

#### 485 **Transfection of cells with miRNA mimics or inhibitors**

486 Mouse miR-466d-3p mimics, inhibitors, mimics control and negative controls were purchased  
487 from GenePharma (China). The sequences of the mimics, inhibitors, mimics control and  
488 controls oligo nucleotides were as follows: miR-466d-3p mimics,  
489 5'-UAUACAUACACGCACACAUAG-3' (forward) and  
490 5'-AUGUGUGCGUGUAUGUAUAAU-3' (reverse); mimic negative controls,  
491 5'-UUCUCCGAACGUGUCACGUTT-3' (forward) and  
492 5'-ACGUGACACGUUCGGAGAATT-3' (reverse); miR-466d-3p inhibitor,  
493 3'-CUAUGUGUGCGUGUAUGUAUA-5'; and inhibitor negative control,  
494 3'-CAGUACUUUUGUGUAGUACAA-5'. All of miRNA mimics (1.5 µmol/well), inhibitors  
495 (1.5 µmol/well) and control (3 µmol/well) were transfected into BV-2 cells or NA cells (10<sup>6</sup>  
496 cells/well) in 12-well plates using Lipofectamine 3000 (Invitrogen) according to the  
497 manufacturer's instructions.

#### 498 **Viral infection**

499 BV-2 cells, NA cells or bEnd.3 cells were seeded in 12-well plates (10<sup>6</sup> cells/well). Until  
500 grown to 80% confluence, the cells were incubated with serum-free medium or JEV at a  
501 multiplicity of infection (MOI) of 0.1 at 37°C for 2h. After discard of unbound virus and

502 medium, the cells were cultured in 1640 with 10% FBS, 1% Penicillin-Streptomycin Liquid  
503 (PS) at 37°C in 5% CO<sub>2</sub> for 48h. Cells and supernatants were collected 48 h post-infection  
504 (hpi).

#### 505 **RNA isolation and Reverse transcription real-time PCR.**

506 The total RNA of the cells was isolated by trizol reagent (Thermo Fisher) according to the  
507 Manufacturer's recommendations and used for qRT-PCR in an Applied Biosystems® 7500  
508 Real-Time PCR Systems (Thermo fisher) as described previously. For the evaluation of  
509 mRNA, to obtain cDNA, the total RNA (1 µg) was reverse transcribed by PrimeScript RT  
510 reagent Kit with gDNA Eraser (Takara, China). The IL-1β and components of RISC mRNA  
511 expression levels of the NA cells were quantified with the SYBR Green qPCR kit (Takara) by  
512 following the manufacturer's instruction using gene-specific primers (S2 Table).  
513 Amplification was performed at 95°C for 30 s ,95°C for 5 s, 60°C for 34 s, followed by 40  
514 cycles of 95°C for 15 s, 60°C for 1 min, 95°C for 30 s, and 60°C for 15 s. The expression of  
515 IL-1β was normalized to the level of glyceraldehyde-3-phosphate dehydrogenase (GAPDH)  
516 expression using the 2-ΔΔCT method as previously (69). For the expression of miRNA, the  
517 reverse transcription primers of all miRNA were added with specific stem-loop structure at  
518 the end of 5' (S3 Table). The pri-, pre- and mature-miRNA levels of cells were quantified  
519 with the SYBR Green qPCR kit using miRNA sequence-specific primers (S4 Table and S5  
520 Table). Amplification was performed at 95°C for 30 s ,95°C for 5 s, 60°C for 34 s, followed  
521 by 40 cycles of 95°C for 15 s, 60°C for 1 min, 95°C for 30 s, and 60°C for 15 s. The relative  
522 levels of microRNAs were normalizing to U6 determined by the 2-ΔΔCT method as  
523 previously (73).

#### 524 **ELISA**

525 The culture supernatants of the experimental group and control group cells or brain tissue  
526 lysates were collected and stored at -80°C. The protein levels of IL-1β in cell cultures or  
527 mouse brain tissue lysates were determined by enzyme-linked immunosorbent assay (ELISA)  
528 kits (eBioscience) according to the manufacturer's instructions.

#### 529 **Immunoprecipitations**

530 Immunoprecipitation with FLAG fused protein was performed as described previously (70).  
531 Briefly, BSR cells was transfected with the FLAG-tagged plasmid. At 48 hpi, the cells

532 expressing FLAG fusion protein were harvested and lysed with CelLytic™ M lysis buffer  
533 (Sigma) containing protease inhibitor cocktail (Sigma) in 4°C for 30 minutes on a shaker at  
534 10 rpm. Each cell lysate was incubated with ANTI-FLAG M2 affinity gel (Sigma) at 4°C  
535 overnight on a shaker at 10 rpm. Then, the agarose gel was centrifuged for 30 seconds at 8200  
536 g to remove the supernatants. After three times washed with 0.5 ml of TBS, the bound  
537 proteins were eluted by boiling with SDS-PAGE loading buffer for 5 min and determined  
538 with Western blotting.

### 539 **Western blotting**

540 The cells were lysed with RIPA Lysis and Extraction Buffer (Thermo Scientific), and the  
541 protein level was measured with the Enhanced BCA Protein Assay kit (Sigma-Aldrich). The  
542 extracts which contained 25 µg of total proteins were subjected to 10% SDS polyacrylamide  
543 gel, and protein blots were transferred to Nitrocellulose membrane (NC) after electrophoresis.  
544 The membrane was then washed with TBST and blocked in 5% skimmed milk at 4°C  
545 overnight. All primary antibodies were prepared at a dilution of 1:1,000 in 1% bovine serum  
546 albumin (BSA) in 1×PBST, followed by horseradish peroxidase-conjugated secondary  
547 antibodies (Sigma) for 1h at room temperature. Blots were detected by enhanced  
548 chemiluminescence reagent (Thermo Scientific) and developed by exposure in Tanon 5200  
549 (Tanon) using Tanon MP software. In addition,  $\alpha$ -tubulin played the role of an internal  
550 control.

### 551 **RNA immunoprecipitation (RIP)**

552 RIP was performed as previously (48), with slight modification. Briefly, NA cells was  
553 transfected with the FLAG-tagged NS3, FLAG-tagged NS2B or FLAG-tagged pcDNA 3.1  
554 pcDNA3.1 plasmid for 48h.  $10^7$  cells expressing FLAG fusion protein were harvested with  
555 2.5% trypsin and resuspended in 5ml PBS. 143µl of 37% formaldehyde was added to the  
556 resuspension to cross-link for 10 minutes on a shaker, and 685µl of 2M the glycine was used  
557 to block the formaldehyde. The cells were washed twice by 5ml ice-cold PBS and centrifuged  
558 for 2 minutes at 400 g to collect the cells pellet. 1ml CelLytic™ M lysis buffer (Sigma)  
559 containing 20µl 0.1M Phenylmethylsulfonyl fluoride, 20µl protease inhibitor cocktail (Sigma)  
560 and 5µl 40U/µl RNase inhibitor (Invitrogen) was added to cells, and the cells were kept on ice  
561 and sonicated for 2 mins (10 sec on, 10 sec off, Amplitude 15 µm) until the lysate is clear.

562 Followed by centrifuging the lysate for 3 minutes at 14000g to collect supernatant. Each 1ml  
563 cell lysate was added to the 40µl washed with ANTI-FLAG M2 affinity gel (Sigma) at 4°C  
564 for 4h on a shaker at 10 rpm. The next step was to centrifuge the resin for 30 seconds at 8200  
565 g and remove the supernatants. After the resin was washed three times with 0.5 ml 500µl of  
566 TBS, the total RNA was extracted with Trizol reagent and analyzed by RT-qPCR.  
567 The fold change of each RIP reaction from RT-qPCR data was calculated via  $2^{-\Delta\Delta CT}$   
568 method as previously with minor modification (42) and the formulas see below. All the Ct  
569 value of each specimen (FLAG-tagged NS3, FLAG-tagged NS2B or FLAG non-fused blank  
570 pcDNA3.1) was normalized with the Input RNA to eliminate the possible differences in RNA  
571 samples preparation ( $\Delta Ct$ ). To obtain the  $\Delta\Delta Ct$ , the normalized experimental RIP fraction  
572 value ( $\Delta Ct$ ) was normalized to unspecific background as an internal control ( $\Delta Ct$  normalized  
573 of pcDNA3.1 sample). Finally, the  $\Delta\Delta Ct$  [Experimental/pcDNA3.1] was performed with  
574 linear conversion to calculate the Fold enrichment. The formula of Fold enrichment is shown  
575 below.

$$576 \quad \Delta Ct = Ct[RIP] - (Ct[Input] - \log_2(\text{Input/RIP dilution factor}))$$

$$577 \quad \Delta\Delta Ct[\text{Experimental/pcDNA3.1}] = \Delta Ct[\text{Experimental}] - \Delta Ct[\text{pcDNA3.1}]$$

$$578 \quad \text{Fold enrichment} = 2^{(-\Delta\Delta Ct[\text{Experimental/pcDNA3.1}])}$$

579

### 580 **MicroRNA target prediction**

581 The sequences for the miRNA whose expression changed during JEV Infection have been  
582 submitted to the public miRNA database miRBase ([www.mirbase.org](http://www.mirbase.org)). The miR-466d-3p  
583 target binding sites in the 3'UTRs of mouse gene transcripts were identified with Target Scan  
584 software (<http://www.targetscan.org/>).

### 585 **Bioinformatics Analysis of the changed miRNA**

586 The total RNA was isolated from mouse brains with Trizol reagent (Invitrogen) for miRNA  
587 and mRNA Microarray. miRNA and mRNA hybridization were performed by shanghaiBio  
588 Corporation (shanghai, China) with the use of  $8 \times 15$  K Agilent Mouse microRNA  
589 Microarray and  $4 \times 44$  K Agilent Whole Mouse Genome Oligo Microarray. For each sample

590 pair, the experiments were done with two independent hybridizations for miRNA (Agilent's  
591 miRNA Complete Labeling and Hyb Kit) or for mRNA (Cy3 and Cy5 interchanging  
592 labeling). Hybridized arrays were scanned at 5  $\mu$ m resolution on a Microarray Scanner  
593 (Agilent p/n G2565BA). Data extraction from images was done by using Agilent Feature  
594 Extraction (FE) software version 9.5.3. The mRNAs which were caused significant changes  
595 (change fold  $\geq$  2.0, p value  $<$  0.05) by JEV infection in mouse brain were clustered using GO  
596 and KEGG enrichment tools (ShanghaiBio Analysis System). And the interaction of the most  
597 significantly differential expression proteins was retrieved by STRING (59).

### 598 **Construction of mutant NS3 plasmids**

599 The plasmid encoding FLAG-tag E, C, PrM, NS1, NS2A, NS2B, NS3, NS4A, NS4B, and  
600 NS5 cDNA clone in pcDNA3.1 (+) flanked by Kpn I ribozyme and Xba I ribozyme  
601 sequences as described previously (70). The AA residues at R202W, R226G R464Q of NS3  
602 in the SA strain were swapped individually or both by overlap extension PCR as described  
603 previously. Briefly, in a PCR reaction 1  $\mu$ l of full-length NS3 gene cDNA was mutated and  
604 amplified with 20  $\mu$ M each of 202, 226 or 464 site mutation forward and reverse primers and  
605 20  $\mu$ M each of JEV-NS3 forward and reverse primers using PrimeSTAR GXL DNA  
606 Polymerase (TAKARA) according to the manufacturer's instructions. The size of PCR  
607 products was 1.86 kb and the products were purified by gel purification kit. The PCR mixture  
608 was heated at 94  $^{\circ}$ C for 2 min, followed by 35 cycles of amplification at 98  $^{\circ}$ C for 10 s, 55  $^{\circ}$ C  
609 for 30s and 68  $^{\circ}$ C for 1min45s, and a final extension at 68  $^{\circ}$ C for 10 min. All NS3 fragments  
610 with FLAG-tag that included AA mutations and NS3 cDNA vector were digested with  
611 enzyme sets KpnI and XbaI (Thermo Scientific). Following the digestions, the NS3 fragments  
612 with FLAG-tag and NS3 cDNA vector were ligated together at an approximate molar ratio of  
613 1:3 using TaKaRa DNA Ligation Kit LONG (TAKARA) according to the manufacturer's  
614 instructions.

### 615 **The integrative analysis of miRNAs and mRNAs**

616 Usually, there were more than hundreds target genes among each miRNA used 3 miRNA  
617 target predication databases TargetScan (1), miRDB (67) and microRNA (5). The integrative  
618 analysis of miRNAs and mRNAs allowed us to predict the major target of the decreasing  
619 miRNAs. To accurately elucidate the correlation between the mRNA expression pattern and

620 miRNA targeted regulation, mRNA expression files were measured with mRNA microarray  
621 to predict the major decreasing miRNAs in mice brain. Firstly, those abnormal miRNAs  
622 target mRNAs were used to find out the common mRNA (with a threshold of fold change  $\geq$   
623 2.0, p value  $< 0.01$ ) from the mRNA expression profile and miRNA expression profile. Using  
624 those common genes as seed, a protein-protein interaction network was constructed to  
625 discover the core gene of miRNA target. A total of 42 interacting proteins with 177  
626 interactions were retrieved from the STRING database (protein-protein interaction enrichment  
627 p value  $< 1.0e-15$ ). The k-Means clustering algorithm was applied to segregate the network of  
628 those interacting proteins into different subgroup.

### 629 **LC-MS analysis**

630 The FLAG fused NS3 was purified by immunoprecipitation and washed with pure  
631 water twice in 0.5 ml Eppendorf tube. The following procedure to digest was  
632 performed as previously described (33). To dehydrate, the specimen was treated with  
633 50% acetonitrile for 30 min send following with 100% acetonitrile for another 30 mi.  
634 After dehydration, the gel was dried in SpeedVac concentrator (Thermo Savant,  
635 Holbrook, NY, USA) for 30 min then restored with reduction buffer (25mM  
636  $\text{NH}_4\text{HCO}_3$  in 10mM DTT) at 57°C for 1 hafted removing reduction buffer, the gel  
637 was dehydrated again with 50% and 100% acetonitrile respectively for 30 min. To  
638 rehydrate, the gel was removed acetonitrile and incubated with 10 $\mu\text{L}$  0.02 $\mu\text{g}/\mu\text{L}$   
639 trypsin in 25mM  $\text{NH}_4\text{HCO}_3$  for 30 min at RT. For tryptic digestion, 20  $\mu\text{L}$  cover  
640 solution (25mM  $\text{NH}_4\text{HCO}_3$  in 10% acetonitrile) was added for digested 16 hours at  
641 37°C, and the supernatants were transferred into another tube. For peptide extraction,  
642 the gel was extracted with 50  $\mu\text{L}$  extraction buffer (5% TFA in 67% acetonitrile) at  
643 37°C for 30min. Finally, the peptide extracts and the supernatant of the gel were  
644 combined and then completely dried in Speed Vac concentrator. The specimen was  
645 analyzed by the direct nanoflow liquid chromatography tandem mass spectrometry  
646 (LC-MS/MS) system and the ion spectra data were identified in the protein database.

### 647 **Ethics Statement**

648 The experimental infectious studies were performed in strict accordance with the Guide for

649 the Care and Use of Laboratory Animals Monitoring Committee of Hubei Province, China,  
650 and the protocol was approved by the Scientific Ethics Committee of Huazhong Agricultural  
651 University (protocol No. Hzaumo-2015-018). All efforts were made to minimize the suffering  
652 of the animals.

653 **Statistical analysis**

654 All experiments were performed at least three times with similar results. The data generated  
655 were analyzed using GraphPad Prism 5 (GraphPad Software, San Diego, CA). For all tests,  
656 the P value of  $<0.05$  was considered significant.

657



## 658 **References**

- 659 1. **Agarwal, V., G. W. Bell, J. W. Nam, and D. P. Bartel.** 2015. Predicting effective  
660 microRNA target sites in mammalian mRNAs. *eLife* **4**.
- 661 2. **Ameres, S. L., M. D. Horwich, J. H. Hung, J. Xu, M. Ghildiyal, Z. Weng, and P. D.**  
662 **Zamore.** 2010. Target RNA-directed trimming and tailing of small silencing RNAs.  
663 *Science* **328**:1534-1539.
- 664 3. **Ashraf, U., B. Zhu, J. Ye, S. Wan, Y. Nie, Z. Chen, M. Cui, C. Wang, X. Duan, H.**  
665 **Zhang, H. Chen, and S. Cao.** 2016. MicroRNA-19b-3p Modulates Japanese  
666 Encephalitis Virus-Mediated Inflammation via Targeting RNF11. *Journal of virology*  
667 **90**:4780-4795.
- 668 4. **Backes, S., J. S. Shapiro, L. R. Sabin, A. M. Pham, I. Reyes, B. Moss, S. Cherry, and**  
669 **B. R. tenOever.** 2012. Degradation of host microRNAs by poxvirus poly(A)  
670 polymerase reveals terminal RNA methylation as a protective antiviral mechanism.  
671 *Cell host & microbe* **12**:200-210.
- 672 5. **Betel, D., M. Wilson, A. Gabow, D. S. Marks, and C. Sander.** 2008. The  
673 microRNA.org resource: targets and expression. *Nucleic acids research*  
674 **36**:D149-153.
- 675 6. **Burgyan, J., and Z. Havelda.** 2011. Viral suppressors of RNA silencing. *Trends in*  
676 *plant science* **16**:265-272.
- 677 7. **Campbell, G. L., S. L. Hills, M. Fischer, J. A. Jacobson, C. H. Hoke, J. M. Hombach,**  
678 **A. A. Marfin, T. Solomon, T. F. Tsai, V. D. Tsu, and A. S. Ginsburg.** 2011. Estimated  
679 global incidence of Japanese encephalitis: a systematic review. *Bulletin of the World*

- 680 Health Organization **89**:766-774, 774A-774E.
- 681 8. **Cazalla, D., T. Yario, and J. A. Steitz.** 2010. Down-regulation of a host microRNA by  
682 a Herpesvirus saimiri noncoding RNA. *Science* **328**:1563-1566.
- 683 9. **Chatterjee, S., and H. Grosshans.** 2009. Active turnover modulates mature microRNA  
684 activity in *Caenorhabditis elegans*. *Nature* **461**:546-549.
- 685 10. **Chen, C. J., J. H. Chen, S. Y. Chen, S. L. Liao, and S. L. Raung.** 2004. Upregulation  
686 of RANTES gene expression in neuroglia by Japanese encephalitis virus infection.  
687 *Journal of virology* **78**:12107-12119.
- 688 11. **Chen, C. J., M. D. Kuo, L. J. Chien, S. L. Hsu, Y. M. Wang, and J. H. Lin.** 1997.  
689 RNA-protein interactions: involvement of NS3, NS5, and 3' noncoding regions of  
690 Japanese encephalitis virus genomic RNA. *Journal of virology* **71**:3466-3473.
- 691 12. **Chen, C. J., Y. C. Ou, S. Y. Lin, S. L. Raung, S. L. Liao, C. Y. Lai, S. Y. Chen, and J.**  
692 **H. Chen.** 2010. Glial activation involvement in neuronal death by Japanese  
693 encephalitis virus infection. *The Journal of general virology* **91**:1028-1037.
- 694 13. **Chen, P. S., J. L. Su, S. T. Cha, W. Y. Tarn, M. Y. Wang, H. C. Hsu, M. T. Lin, C. Y.**  
695 **Chu, K. T. Hua, C. N. Chen, T. C. Kuo, K. J. Chang, M. Hsiao, Y. W. Chang, J. S.**  
696 **Chen, P. C. Yang, and M. L. Kuo.** 2011. miR-107 promotes tumor progression by  
697 targeting the let-7 microRNA in mice and humans. *The Journal of clinical investigation*  
698 **121**:3442-3455.
- 699 14. **Chen, Z., J. Ye, U. Ashraf, Y. Li, S. Wei, S. Wan, A. Zohaib, Y. Song, H. Chen, and S.**  
700 **Cao.** 2016. MicroRNA-33a-5p Modulates Japanese Encephalitis Virus Replication by  
701 Targeting Eukaryotic Translation Elongation Factor 1A1. *Journal of virology*

- 702           **90:3722-3734.**
- 703    15.    **Chendrimada, T. P., R. I. Gregory, E. Kumaraswamy, J. Norman, N. Cooch, K.**  
704           **Nishikura, and R. Shiekhattar.** 2005. TRBP recruits the Dicer complex to Ago2 for  
705           microRNA processing and gene silencing. *Nature* **436:740-744.**
- 706    16.    **Chernov, A. V., S. A. Shiryayev, A. E. Aleshin, B. I. Ratnikov, J. W. Smith, R. C.**  
707           **Liddington, and A. Y. Strongin.** 2008. The two-component NS2B-NS3 proteinase  
708           represses DNA unwinding activity of the West Nile virus NS3 helicase. *The Journal of*  
709           *biological chemistry* **283:17270-17278.**
- 710    17.    **Chiang, P. Y., and H. N. Wu.** 2016. The role of surface basic amino acids of dengue  
711           virus NS3 helicase in viral RNA replication and enzyme activities. *FEBS letters*  
712           **590:2307-2320.**
- 713    18.    **Chua, J. J., R. Bhuvanakantham, V. T. Chow, and M. L. Ng.** 2005. Recombinant  
714           non-structural 1 (NS1) protein of dengue-2 virus interacts with human STAT3beta  
715           protein. *Virus research* **112:85-94.**
- 716    19.    **Das, S., M. K. Mishra, J. Ghosh, and A. Basu.** 2008. Japanese Encephalitis Virus  
717           infection induces IL-18 and IL-1beta in microglia and astrocytes: correlation with in  
718           vitro cytokine responsiveness of glial cells and subsequent neuronal death. *Journal of*  
719           *neuroimmunology* **195:60-72.**
- 720    20.    **Dziembowski, A., J. Piwowarski, R. Hoser, M. Minczuk, A. Dmochowska, M. Siep, H.**  
721           **van der Spek, L. Grivell, and P. P. Stepien.** 2003. The yeast mitochondrial  
722           degradosome. Its composition, interplay between RNA helicase and RNase activities  
723           and the role in mitochondrial RNA metabolism. *The Journal of biological chemistry*

- 724           **278**:1603-1611.
- 725   21.   **Elbarbary, R. A., K. Miyoshi, O. Hedaya, J. R. Myers, and L. E. Maquat.** 2017. UPF1  
726           helicase promotes TSN-mediated miRNA decay. *Genes & development*  
727           **31**:1483-1493.
- 728   22.   **Evguenieva-Hackenberg, E., P. Walter, E. Hochleitner, F. Lottspeich, and G. Klug.**  
729           2003. An exosome-like complex in *Sulfolobus solfataricus*. *EMBO reports* **4**:889-893.
- 730   23.   **Frankel, A. D., and J. A. Young.** 1998. HIV-1: fifteen proteins and an RNA. *Annual*  
731           review of biochemistry **67**:1-25.
- 732   24.   **Friedlander, M. R., S. D. Mackowiak, N. Li, W. Chen, and N. Rajewsky.** 2012.  
733           miRDeep2 accurately identifies known and hundreds of novel microRNA genes in  
734           seven animal clades. *Nucleic acids research* **40**:37-52.
- 735   25.   **Ghoshal, A., S. Das, S. Ghosh, M. K. Mishra, V. Sharma, P. Koli, E. Sen, and A.**  
736           **Basu.** 2007. Proinflammatory mediators released by activated microglia induces  
737           neuronal death in Japanese encephalitis. *Glia* **55**:483-496.
- 738   26.   **Guo, Y. E., and J. A. Steitz.** 2014. Virus meets host microRNA: the destroyer, the  
739           booster, the hijacker. *Molecular and cellular biology* **34**:3780-3787.
- 740   27.   **Haasnoot, J., W. de Vries, E. J. Geutjes, M. Prins, P. de Haan, and B. Berkhout.**  
741           2007. The Ebola virus VP35 protein is a suppressor of RNA silencing. *PLoS*  
742           pathogens **3**:e86.
- 743   28.   **Han, Y. W., J. Y. Choi, E. Uyangaa, S. B. Kim, J. H. Kim, B. S. Kim, K. Kim, and S. K.**  
744           **Eo.** 2014. Distinct dictation of Japanese encephalitis virus-induced neuroinflammation  
745           and lethality via triggering TLR3 and TLR4 signal pathways. *PLoS pathogens*

- 746           **10:e1004319.**
- 747   29.   **Happel, C., D. Ramalingam, and J. M. Ziegelbauer.** 2016. Virus-Mediated Alterations  
748           in miRNA Factors and Degradation of Viral miRNAs by MCP1P1. *PLoS biology*  
749           **14:e2000998.**
- 750   30.   **Ibrahim, F., L. A. Rymarquis, E. J. Kim, J. Becker, E. Balassa, P. J. Green, and H.**  
751           **Cerutti.** 2010. Uridylation of mature miRNAs and siRNAs by the MUT68  
752           nucleotidyltransferase promotes their degradation in *Chlamydomonas*. *Proceedings*  
753           of the National Academy of Sciences of the United States of America **107:3906-3911.**
- 754   31.   **Janas, T., J. J. Widmann, R. Knight, and M. Yarus.** 2010. Simple, recurring RNA  
755           binding sites for L-arginine. *Rna* **16:805-816.**
- 756   32.   **Jia, H., X. Wang, J. T. Anderson, and E. Jankowsky.** 2012. RNA unwinding by the  
757           Trf4/Air2/Mtr4 polyadenylation (TRAMP) complex. *Proceedings of the National*  
758           Academy of Sciences of the United States of America **109:7292-7297.**
- 759   33.   **Jung, N., M. Wienisch, M. Gu, J. B. Rand, S. L. Muller, G. Krause, E. M. Jorgensen,**  
760           **J. Klingauf, and V. Haucke.** 2007. Molecular basis of synaptic vesicle cargo  
761           recognition by the endocytic sorting adaptor stonin 2. *The Journal of cell biology*  
762           **179:1497-1510.**
- 763   34.   **Kakumani, P. K., S. S. Ponia, R. K. S, V. Sood, M. Chinnappan, A. C. Banerjea, G. R.**  
764           **Medigeshi, P. Malhotra, S. K. Mukherjee, and R. K. Bhatnagar.** 2013. Role of RNA  
765           interference (RNAi) in dengue virus replication and identification of NS4B as an RNAi  
766           suppressor. *Journal of virology* **87:8870-8883.**
- 767   35.   **Khanna, N., A. Mathur, and U. C. Chaturvedi.** 1994. Regulation of vascular

- 768 permeability by macrophage-derived chemotactic factor produced in Japanese  
769 encephalitis. *Immunology and cell biology* **72**:200-204.
- 770 36. **Kumar, M., M. M. Gromiha, and G. P. Raghava.** 2008. Prediction of RNA binding  
771 sites in a protein using SVM and PSSM profile. *Proteins* **71**:189-194.
- 772 37. **Lee, S., J. Song, S. Kim, J. Kim, Y. Hong, Y. Kim, D. Kim, D. Baek, and K. Ahn.** 2013.  
773 Selective degradation of host MicroRNAs by an intergenic HCMV noncoding RNA  
774 accelerates virus production. *Cell host & microbe* **13**:678-690.
- 775 38. **Li, S., K. Yamashita, K. M. Amada, and D. M. Standley.** 2014. Quantifying sequence  
776 and structural features of protein-RNA interactions. *Nucleic acids research*  
777 **42**:10086-10098.
- 778 39. **Libri, V., A. Helwak, P. Miesen, D. Santhakumar, J. G. Borger, G. Kudla, F. Grey, D.**  
779 **Tollervey, and A. H. Buck.** 2012. Murine cytomegalovirus encodes a miR-27 inhibitor  
780 disguised as a target. *Proceedings of the National Academy of Sciences of the United*  
781 *States of America* **109**:279-284.
- 782 40. **Lindenbach, B. D., Thiel, H.J., Rice, C.M.** 2007. *Flaviviridae: The Viruses and Their*  
783 *Replication.* Lippincott-Raven Publishers, Philadelphia.
- 784 41. **Marcinowski, L., M. Tanguy, A. Krmpotic, B. Radle, V. J. Lisnic, L. Tuddenham, B.**  
785 **Chane-Woon-Ming, Z. Ruzsics, F. Erhard, C. Benkartek, M. Babic, R. Zimmer, J.**  
786 **Trgovcich, U. H. Koszinowski, S. Jonjic, S. Pfeffer, and L. Dolken.** 2012. Degradation  
787 of cellular mir-27 by a novel, highly abundant viral transcript is important for efficient  
788 virus replication in vivo. *PLoS pathogens* **8**:e1002510.
- 789 42. **Marmisolle, F. E., M. L. Garcia, and C. A. Reyes.** 2018. RNA-binding protein

- 790 immunoprecipitation as a tool to investigate plant miRNA processing interference by  
791 regulatory proteins of diverse origin. *Plant methods* **14**:9.
- 792 43. **Moon, S. L., B. J. Dodd, D. E. Brackney, C. J. Wilusz, G. D. Ebel, and J. Wilusz.**  
793 2015. Flavivirus sfRNA suppresses antiviral RNA interference in cultured cells and  
794 mosquitoes and directly interacts with the RNAi machinery. *Virology* **485**:322-329.
- 795 44. **Morita, K., T. Nabeshima, and C. C. Buerano.** 2015. Japanese encephalitis. *Revue*  
796 *scientifique et technique* **34**:441-452.
- 797 45. **Muppirala, U. K., V. G. Honavar, and D. Dobbs.** 2011. Predicting RNA-protein  
798 interactions using only sequence information. *BMC bioinformatics* **12**:489.
- 799 46. **Murray, C. L., C. T. Jones, and C. M. Rice.** 2008. Architects of assembly: roles of  
800 Flaviviridae non-structural proteins in virion morphogenesis. *Nature reviews.*  
801 *Microbiology* **6**:699-708.
- 802 47. **Nazmi, A., S. Mukherjee, K. Kundu, K. Dutta, A. Mahadevan, S. K. Shankar, and A.**  
803 **Basu.** 2014. TLR7 is a key regulator of innate immunity against Japanese  
804 encephalitis virus infection. *Neurobiology of disease* **69**:235-247.
- 805 48. **Peritz, T., F. Zeng, T. J. Kannanayakal, K. Kilk, E. Eiriksdottir, U. Langel, and J.**  
806 **Eberwine.** 2006. Immunoprecipitation of mRNA-protein complexes. *Nature protocols*  
807 **1**:577-580.
- 808 49. **Py, B., C. F. Higgins, H. M. Krisch, and A. J. Carpousis.** 1996. A DEAD-box RNA  
809 helicase in the *Escherichia coli* RNA degradosome. *Nature* **381**:169-172.
- 810 50. **Raung, S. L., S. Y. Chen, S. L. Liao, J. H. Chen, and C. J. Chen.** 2007. Japanese  
811 encephalitis virus infection stimulates Src tyrosine kinase in neuron/glia.

- 812 Neuroscience letters **419**:263-268.
- 813 51. **Salzman, D. W., J. Shubert-Coleman, and H. Furneaux.** 2007. P68 RNA helicase  
814 unwinds the human let-7 microRNA precursor duplex and is required for let-7-directed  
815 silencing of gene expression. The Journal of biological chemistry **282**:32773-32779.
- 816 52. **Schnettler, E., W. de Vries, H. Hemmes, J. Haasnoot, R. Kormelink, R. Goldbach,**  
817 **and B. Berkhout.** 2009. The NS3 protein of rice hoja blanca virus complements the  
818 RNAi suppressor function of HIV-1 Tat. EMBO reports **10**:258-263.
- 819 53. **Sharma, N., K. L. Kumawat, M. Rastogi, A. Basu, and S. K. Singh.** 2016. Japanese  
820 Encephalitis Virus exploits the microRNA-432 to regulate the expression of  
821 Suppressor of Cytokine Signaling (SOCS) 5. Scientific reports **6**:27685.
- 822 54. **Slonchak, A., R. P. Shannon, G. Pali, and A. A. Khromykh.** 2015. Human MicroRNA  
823 miR-532-5p Exhibits Antiviral Activity against West Nile Virus via Suppression of Host  
824 Genes SESTD1 and TAB3 Required for Virus Replication. Journal of virology  
825 **90**:2388-2402.
- 826 55. **Solomon, T., N. M. Dung, R. Kneen, M. Gainsborough, D. W. Vaughn, and V. T.**  
827 **Khanh.** 2000. Japanese encephalitis. Journal of neurology, neurosurgery, and  
828 psychiatry **68**:405-415.
- 829 56. **Song, L., H. Liu, S. Gao, W. Jiang, and W. Huang.** 2010. Cellular microRNAs inhibit  
830 replication of the H1N1 influenza A virus in infected cells. Journal of virology  
831 **84**:8849-8860.
- 832 57. **Su, L., J. T. Radek, K. Hallenga, P. Hermanto, G. Chan, L. A. Labeots, and M. A.**  
833 **Weiss.** 1997. RNA recognition by a bent alpha-helix regulates transcriptional



- 834 antitermination in phage lambda. *Biochemistry* **36**:12722-12732.
- 835 58. **Swarbrick, C. M. D., C. Basavannacharya, K. W. K. Chan, S. A. Chan, D. Singh, N.**  
836 **Wei, W. W. Phoo, D. Luo, J. Lescar, and S. G. Vasudevan.** 2017. NS3 helicase from  
837 dengue virus specifically recognizes viral RNA sequence to ensure optimal  
838 replication. *Nucleic acids research* **45**:12904-12920.
- 839 59. **Szklarczyk, D., J. H. Morris, H. Cook, M. Kuhn, S. Wyder, M. Simonovic, A. Santos,**  
840 **N. T. Doncheva, A. Roth, P. Bork, L. J. Jensen, and C. von Mering.** 2017. The  
841 STRING database in 2017: quality-controlled protein-protein association networks,  
842 made broadly accessible. *Nucleic acids research* **45**:D362-D368.
- 843 60. **Thounaojam, M. C., D. K. Kaushik, K. Kundu, and A. Basu.** 2014. MicroRNA-29b  
844 modulates Japanese encephalitis virus-induced microglia activation by targeting  
845 tumor necrosis factor alpha-induced protein 3. *Journal of neurochemistry*  
846 **129**:143-154.
- 847 61. **Thounaojam, M. C., K. Kundu, D. K. Kaushik, S. Swaroop, A. Mahadevan, S. K.**  
848 **Shankar, and A. Basu.** 2014. MicroRNA 155 regulates Japanese encephalitis  
849 virus-induced inflammatory response by targeting Src homology 2-containing inositol  
850 phosphatase 1. *Journal of virology* **88**:4798-4810.
- 851 62. **Tuvshinjargal, N., W. Lee, B. Park, and K. Han.** 2016. PRIdictor: Protein-RNA  
852 Interaction predictor. *Bio Systems* **139**:17-22.
- 853 63. **Utama, A., H. Shimizu, S. Morikawa, F. Hasebe, K. Morita, A. Igarashi, M. Hatsu, K.**  
854 **Takamizawa, and T. Miyamura.** 2000. Identification and characterization of the RNA  
855 helicase activity of Japanese encephalitis virus NS3 protein. *FEBS letters* **465**:74-78.

- 856 64. **van Rij, R. P., M. C. Saleh, B. Berry, C. Foo, A. Houk, C. Antoniewski, and R. Andino.**  
857 2006. The RNA silencing endonuclease Argonaute 2 mediates specific antiviral  
858 immunity in *Drosophila melanogaster*. *Genes & development* **20**:2985-2995.
- 859 65. **Wang, P., J. Hou, L. Lin, C. Wang, X. Liu, D. Li, F. Ma, Z. Wang, and X. Cao.** 2010.  
860 Inducible microRNA-155 feedback promotes type I IFN signaling in antiviral innate  
861 immunity by targeting suppressor of cytokine signaling 1. *Journal of immunology*  
862 **185**:6226-6233.
- 863 66. **Wang, W., G. Li, W. De, Z. Luo, P. Pan, M. Tian, Y. Wang, F. Xiao, A. Li, K. Wu, X.**  
864 **Liu, L. Rao, F. Liu, Y. Liu, and J. Wu.** 2018. Zika virus infection induces host  
865 inflammatory responses by facilitating NLRP3 inflammasome assembly and  
866 interleukin-1beta secretion. *Nature communications* **9**:106.
- 867 67. **Wong, N., and X. Wang.** 2015. miRDB: an online resource for microRNA target  
868 prediction and functional annotations. *Nucleic acids research* **43**:D146-152.
- 869 68. **Yang, T. C., S. L. Shiu, P. H. Chuang, Y. J. Lin, L. Wan, Y. C. Lan, and C. W. Lin.**  
870 2009. Japanese encephalitis virus NS2B-NS3 protease induces caspase 3 activation  
871 and mitochondria-mediated apoptosis in human medulloblastoma cells. *Virus*  
872 *research* **143**:77-85.
- 873 69. **Yang, Y., J. Ye, X. Yang, R. Jiang, H. Chen, and S. Cao.** 2011. Japanese  
874 encephalitis virus infection induces changes of mRNA profile of mouse spleen and  
875 brain. *Virology journal* **8**:80.
- 876 70. **Ye, J., Z. Chen, B. Zhang, H. Miao, A. Zohaib, Q. Xu, H. Chen, and S. Cao.** 2013.  
877 Heat shock protein 70 is associated with replicase complex of Japanese encephalitis

- 878 virus and positively regulates viral genome replication. PloS one **8**:e75188.
- 879 71. **Yiang, G. T., Y. H. Chen, P. L. Chou, W. J. Chang, C. W. Wei, and Y. L. Yu.** 2013.
- 880 The NS3 protease and helicase domains of Japanese encephalitis virus trigger cell
- 881 death via caspasedependent and independent pathways. Molecular medicine reports
- 882 **7**:826-830.
- 883 72. **Zheng, Z., X. Ke, M. Wang, S. He, Q. Li, C. Zheng, Z. Zhang, Y. Liu, and H. Wang.**
- 884 2013. Human microRNA hsa-miR-296-5p suppresses enterovirus 71 replication by
- 885 targeting the viral genome. Journal of virology **87**:5645-5656.
- 886 73. **Zhu, B., J. Ye, Y. Nie, U. Ashraf, A. Zohaib, X. Duan, Z. F. Fu, Y. Song, H. Chen, and**
- 887 **S. Cao.** 2015. MicroRNA-15b Modulates Japanese Encephalitis Virus-Mediated
- 888 Inflammation via Targeting RNF125. Journal of immunology **195**:2251-2262.
- 889
- 890
- 891

## 892 Figure Captions

### 893 **FIG 1. JEV infection downregulates global miRNA expression in mice nervous system.**

894 (A) Changes in miRNA expression upon JEV infection of mice brain. The 4-week-old  
895 BALB/c mice was infected with  $10^3$  PFU of P3 or medium control. After 9 days infection, the  
896 miRNA expression level of JEV-infected mice was compared with those from the  
897 non-infected control. The color scale is based on  $\log_2$  changes in expression. (B) Changes in  
898 miRNA expression upon JEV infection of NA cells. The NA cells was infected with 0.1 MOI  
899 and 0.01 MOI of P3 or medium control. After 48 hours infection, the miRNA expression level  
900 of JEV-infected cells was compared with those for the non-infected control. The color scale is  
901 based on  $\log_2$  changes in expression. (C) Western blot of NA cells infected with 0.1 MOI and  
902 0.01 MOI of P3 or medium control after 48 hours. (D) Virus titer of NA cells infected with  
903 0.1 MOI and 0.01 MOI of P3 after 48 hours. (E) Quantitative RT-PCR (qRT-PCR) analyses  
904 of the mature miRNA levels in the BV2, NA and bEnd.3 cells after 48 hours JEV infection (1  
905 MOI). For all graphs, results are shown as mean  $\pm$  SD. Significance was assessed using a  
906 Student's t test, \* $p \leq 0.05$ , \*\* $p \leq 0.01$  and \*\*\* $p \leq 0.001$ .

907

### 908 **FIG 2. JEV infection induce incorrect processing of host miRNAs.**

909 pre-miR-466d-3p processing and types of mature miRNAs (miR-466d-3p and miR-466h-3p).  
910 The blue arrow represented the miR-466h-3p located in the pre-miR-466d and the red arrow  
911 represented the miR-466d-3p located in the pre-miR-466d. (B) Analysis of expression level of  
912 mature miR-466d-3p, miR-466h-3p, pre-miR-466d-3p or pri-miR-466d using the quantitative  
913 RT-PCR (qRT-PCR) in in NA or BV2 cells at indicated MOI of P3 after 48 hours infection.  
914 (C) Quantification of exogenous miR-466d mimic degradation in NA cells by qRT-PCR. The  
915 NA cell was infected with P3 at MOI of 0.1 and transfected with miR-466d-3p at 36 hpi.  
916 After 48 hours infection, the total RNA from the NA cells was used to quantitative analysis.  
917 For all graphs, results are shown as mean  $\pm$  SD. Significance was assessed using a Student's t  
918 test, \* $p \leq 0.05$ , \*\* $p \leq 0.01$  and \*\*\* $p \leq 0.001$ .

919

### 920 **FIG 3. NS3 of JEV-mediated degradation of mir-466d in neuron cells.**

(A) Transcriptional

921 and translation inhibition assay. The NA cells was infected with P3 at MOI of 0.1 and the  
922 T-705,  $\alpha$ -Amanitin or CHX were treated with NA cells at 12 hpi or 42 hpi respectively. After  
923 48 hours infection, the total RNA from the NA cells was used to quantify the expression level  
924 of miR-466d-3p. (B) Relative analyses of miR-466d-3p expression level in NA cells that  
925 transfected with indicated expression plasmid with/without JEV infection. After 48 hours  
926 transfection/infection, the total RNA from NA cells was used to quantify the relative  
927 expression level of miR-466d-3p (VS pcDNA 3.1 control) by qRT-PCR. (C) Changes in  
928 miRNA expression upon transfection of NS3 in the NA cells. The NA cells was transfected  
929 with NS3 or pcDNA 3.1 control. After 48 hours transfection, the miRNA expression level of  
930 NS3-transfected cells was measured by RNA deep sequencing and compared with those for  
931 the pcDNA 3.1-transfected control. The color scale is based on  $\log_2$  changes in expression.  
932 (D) qRT-PCR analyses of the mature miRNA levels in NA cells after 48 hours transfection of  
933 NS3. (E) The qRT-PCR analyses of the human miRNA in NA cells after 48 hours  
934 transfection with NS3 or infection with P3 at 0.1 MOI. (F) The qRT-PCR analyses of the  
935 miR-466d-3p in NA cells after 48 hours transfection with NS3 of ZIKA virus, WNV,  
936 DENV1, DENV2, CSFV, BVDV and HCV. (G) Quantification of exogenous miR-466d  
937 mimic degradation in NA cells by qRT-PCR. The NA cell was transfected with NS3, and  
938 after 48 hours the NA cells was transfected with miR-466d-3p mimic. After 54 hours  
939 transfection of NS3, the total RNA from the NA cells was used to quantitative analysis. For  
940 all graphs, results are shown as mean  $\pm$  SD. Significance was assessed using a Student's t test,  
941 \* $p \leq 0.05$ , \*\* $p \leq 0.01$  and \*\*\* $p \leq 0.001$ .

942

943 **FIG 4. Block miR-466d enhance IL-1 $\beta$  secretion and promote JEV replication.** (A) The  
944 homogenization of mice brain was collected at 9 dpi and the expression level of IL-1 $\beta$  in mice  
945 brain was determined by ELISA. (B) The cell supernatant from NA cells was collected at  
946 indicated infection time point and infection dose the expression level of IL-1 $\beta$  was determined  
947 by ELISA. (C) Introduction of miR-466d-3p binding sites in IL-1 $\beta$ , NS3, NS5 and E. The  
948 miR-466d-3p complementary sequences to the coding sequence of IL-1 $\beta$ , NS3, NS5 and E are  
949 indicated as bold and italic. (D-G) The synthetic mimic of miR-466d-3p decreased the  
950 expression of IL-1 $\beta$  and the block the replication of JEV, and the inhibitor of miR-466d-3p

951 has the opposite effect. The NA or BV2 cells was infected/treated with JEV at MOI of 0.01,  
952 LPS 100ng/ml or medium control, respectively. After 48 hours infection/treatment, the cells  
953 was transfected with mimic of miR-466d-3p or inhibitor of miR-466d-3p. (D) After 6 hours  
954 transfection, the total RNA from NA cells was used to quantify the relative expression level  
955 of miR-466d-3p (VS negative control) by qRT-PCR. (E) After 6 hours transfection, the total  
956 RNA from NA cells was used to quantify the relative expression level of IL-1 $\beta$  (VS negative  
957 control) by qRT-PCR. (F) After 6 hours transfection, the supernatant of cells was collected to  
958 quantify the expression level of IL-1 $\beta$  (VS negative control) by ELISA. (G) After 24 hours  
959 transfection, the supernatant of cells was collected to determine the titer of JEV. (H) The  
960 miR-466d target sites-fused GFP was co-transfected with NS3 or/and miR-466d-3p mimic,  
961 after 48 hours transfection the cells were stained with DAPI. The fluorescence was observed  
962 under the fluorescence microscope. For all graphs, results are shown as mean  $\pm$  SD.  
963 Significance was assessed using a Student's t test, \* $p \leq 0.05$ , \*\* $p \leq 0.01$  and \*\*\* $p \leq 0.001$ .

964

965 **FIG 5. Unwinding of host miRNA by NS3 block the silencing function of miRNA.** (A)  
966 Schematic of the synthetic double strand pre-miR-466d-3p mimic and double strand  
967 miR-466d-3p mimic. The sequence of miR-466d-3p in pre-miR-466d-3p was highlighted in  
968 bold. (B-C) The synthetic double strand pre-miR-466d-3 and double strand mimic of  
969 miR-466d-3p were unwound by purified NS3 generated from NA cells. The flag-tagged NS3  
970 was expressed in the NA cells and purified by the affinity gel. The indicated concentrations of  
971 NS3 (0, 1, 3 and 5  $\mu\text{g/ml}$ ) was incubated with 20 pmol of miR-466d-3p mimic (B) or  
972 pre-miR-466d-3 mimic (C). After 2 hours incubation at 37 $^{\circ}\text{C}$ , the miR-466d-3p mimic or  
973 pre-miR-466d-3 mimic was determined by 10% native polyacrylamide gel electrophoresis.  
974 (D) The miR-466d-3 mimic and pre-miR-466d-3 mimic were degraded after the unwinding  
975 with NS3. After 24 hours transfection, the total RNA of NA cells was used to quantify the  
976 relative expression level of miR-466d-3p (VS negative control) by qRT-PCR. (E-F) The  
977 unwinding miR-466d-3p mimic by NS3 could not decrease the expression of IL-1 $\beta$ . The total  
978 RNA of NA cells was used to quantify the relative expression level of IL-1 $\beta$  (VS negative  
979 control) by qRT-PCR (E) and the supernatant of NA cells was used to determine the  
980 expression level of IL-1 $\beta$  by ELISA (F). For all graphs, results are shown as mean  $\pm$  SD.

981 Significance was assessed using a Student's t test, \*p≤0.05, \*\*p ≤0.01 and \*\*\*p ≤0.001.

982

983 **FIG 6. NS3 has specific binding affinity of pre-miRNA.** (A) The pre-miRNA and mature

984 miRNA binding affinity of indicated non-structure protein of JEV was predicated with a

985 webserver named RPISeq (<http://pridb.gdcb.iastate.edu/RPISeq/>) and the Random Forest (RF)

986 that calculated by RPISeq was used to evaluated the RPI. The probability threshold of RF

987 used for positive RPIs was higher than 0.5. (B) The pri-, pre- and mature miRNA level of

988 miR-466D-3p, miR-199a-5p, miR-674-5p, miR-574-5p and miR-467a-3p were selected to

989 determine binding affinity between the NS3 and miRNA by RIP. The NA cells was

990 transfected with plasmid of FLAG-tagged NS3, NS4A or pcDNA 3.1, and these

991 FLAG-tagged proteins was purified by affinity gel after 48 hours transfection. After

992 purification, the total RNA on the FLAG-tagged protein was used to quantify the relative

993 binding affinity of indicated pri-, pre- and mature miRNA (VS pcDNA 3.1 control) by

994 qRT-PCR. The fold change of each RIP reaction from qRT-PCR data was calculated as Fold

995 enrichment= $2^{-(\Delta \Delta Ct[\text{Experimental} / \text{pcDNA } 3.1])}$ ,  $\Delta \Delta Ct[\text{Experimental}/\text{pcDNA } 3.1]=$

996  $\Delta Ct[\text{Experimental}]-\Delta Ct[\text{pcDNA } 3.1]$ ,  $\Delta Ct=Ct[\text{RIP}]-(\text{Ct}[\text{Input}]-\log_2(\text{Input}/\text{RIP}$

997  $\text{factor}))$ . (C) The pre-miR-466d-3p mimic and NS3 were colocalized in the NA cells. After 48

998 hours transfection, the CY3 labeled miR-466d-3p mimic and NS3 stained with FITC in NA

999 cells were detected by fluorescence microscope. Images are representative of three

1000 independent experiments. For all graphs, results are shown as mean ± SD. Significance was

1001 assessed using a Student's t test, \*p≤0.05, \*\*p ≤0.01 and \*\*\*p ≤0.001.

1002

1003 **FIG 7. NS3-mediated the miRNA degradation dependent on arginine rich motifs.** (A-B)

1004 The RNA binding sites on the NS3 were predicted with 3 webserver (supplement) and 3 of

1005 arginine has higher RNA binding affinity than others. The sequence of these predicted RNA

1006 binding sites was changed to other amino acid as indicated and evaluated the RNA binding

1007 affinity by binary propensity (A). After changed all three AA sites (R202W, R226G and

1008 R464Q), the probability threshold of RF was evaluated. The probability threshold of RF used

1009 for positive RPIs was higher than 0.5 (B). (C) The pri-, pre- and mature miR-466-3p binding

1010 affinity of the substitution mutant of NS3 was determined by the RIP assay. Three  
1011 substitution mutant vectors of NS3 named as R202W, R226G and R464Q was constructed by  
1012 overlap extension PCR. After 48 hours transfection, the FLAG-tagged NS3 was purified with  
1013 affinity gel and the total RNA on the NS3 was used to quantify the relative binding affinity of  
1014 pre-miR-466-3p (VS pcDNA 3.1 control) by qRT-PCR. The fold change of each RIP reaction  
1015 from qRT-PCR data was calculated as  $\text{Fold enrichment} = 2^{-(\Delta \Delta C_t[\text{Experimental} / \text{pcDNA 3.1}])}$ . (D)  
1016 Relative analyses of miR-466d-3p expression level in NA cells that transfected with indicated  
1017 expression plasmid. After 48 hours transfection, the total RNA from NA cells was used to  
1018 quantify the relative expression level of miR-466d-3p (VS pcDNA 3.1 control) by qRT-PCR.  
1019 For all graphs, results are shown as mean  $\pm$  SD. Significance was assessed using a Student's t  
1020 test, \* $p \leq 0.05$ , \*\* $p \leq 0.01$  and \*\*\* $p \leq 0.001$ .

1021

## 1022 **Supporting Information Legends**

1023 **S1 Fig. The protein interaction network was constructed by STRING that based on the**  
1024 **candidate genes (42 genes) of common mRNA from the miRNAs and mRNA expression**  
1025 **profile.** Light blue lines, indicated interactions from curated databases. Purple lines,  
1026 experimentally validated interactions. Green lines, predicted interactions from gene  
1027 neighborhoods. Red lines, predicted interactions from gene fusions. Dark blue lines, predicted  
1028 interactions from gene co-occurrence. Yellow lines, represented interactions from textmining.  
1029 Light purple lines, interactions from protein homology. Blank lines, interactions from  
1030 co-expression. And the dotted lines indicated interactions of bridge different subnetworks.  
1031 The colored nodes in the network showed the query proteins and first shell of interactors. The  
1032 network is divided into many groups according to biological Process (GO). The red nodes in  
1033 the network represented the genes which played a role in the immune and inflammation  
1034 process. Average number of connections per node is 2.81 (protein-protein interaction  
1035 enrichment p value  $< 1.0e-15$ ).

1036

1037 **S2 Fig. The mature miRNA sequence-specific reads were determined by deep**  
1038 **sequencing of the 18–24 nt fraction of JEV-infected or NS3-expressed cells.** The mature



1039 miR-466d-3p, miR-381-3p, miR-466a-3p, miR-467a-3p, miR-199a-5p and miR-466h-3p  
1040 sequence-specific reads were determined by deep sequencing of the 18-24 nt fraction of  
1041 P3-infected cells, or NS3 transfected cells. The bold type sequence represents the correct  
1042 sequence of the miRNA. The percentage of indicated sequence reads was analyzed by the  
1043 miRDeep2.

1044

1045 **S3 Fig. Phylogenetic tree and alignment based on the full-length NS3 sequences of 37**  
1046 **Flaviviride virus strains.** Phylogenetic tree deduced from a full-length alignment of NS3  
1047 from indicated viruses using the neighbor-Joining method as implemented in MEGA7 (Left).  
1048 The numbers below the branches are bootstrap values for 1000 replicates. Phylogenetic  
1049 analysis of 37 NS3 gene nucleotide sequence from Flaviviride included JEV vaccine strain  
1050 SA-14-14-2 (GenBank No. M55506.1), lineage II WNV strain (GenBank No. M12294.2),  
1051 Dengue virus 1 isolate TM100 (GenBank No. KU666942.1), Dengue virus 2 isolate TM26  
1052 (GenBank No. KU666944.1), Zika virus strain MR 766 (GenBank No. AY632535.2),  
1053 Classical swine fever virus C-strain (GenBank No. Z46258.1), Chikungunya virus isolate  
1054 MY/08/4567 (GenBank No. FR687343.1) Hepatitis C virus QC69 subtype 7a (GenBank No.  
1055 EF108306.2) and Bovine viral diarrhea virus 1 isolate MA\_101\_05 (GenBank No.  
1056 LT968777.1). (Right) Alignment of amino acid sequences of NS3 of 37 Flaviviride virus. The  
1057 four conserved amino acids are highlighted in yellow and the arginine is highlighted with blue  
1058 spot.

1059

1060 **S4 Fig. qRT-PCR analysis of Dicer1, AGO1, AGO2, Tmr1, Tsn and Gemin4.** Analysis of  
1061 major components gene expression of Dicer1, AGO1, AGO2, Tmr1, Tsn and Gemin4 using  
1062 qRT-PCR in NAs infected with the indicated P3 after 48 hours.

1063

1064 **S5 Fig. Predication of RNA-binding sites in NS3 amino acid sequence using aaRNA.** The  
1065 RNA binding sites on NS3 of JEV was analyzed using a PDB format of NS3 (PDB entry  
1066 2Z83) with aaRNA (<https://sysimm.ifrec.osaka-u.ac.jp/aarna/>), 4 arginine (R202, R226, R388  
1067 or R464 respectively) on the NS3 has a higher score (> 0.5) than other amino acid sites.

1068

1069 **S6 Fig. Predication of RNA-binding sites in NS3 amino acid sequence using Pprint.** The  
1070 R202 and R464 that located in the helicase region of NS3 has high RNA interacting ability,  
1071 which was analyzed by aaRNA (<http://www.imtech.res.in/raghava/pprint/>).

1072

1073 **S7 Fig. Predication of RNA-binding sites in NS3 amino acid sequence and miRNA**  
1074 **nucleotide sequences using PRIdictor.** The R202 and R226 that located in the helicase  
1075 region of NS3 has high RNA binding ability, which was analyzed by PRIdictor  
1076 (<http://bclab.inha.ac.kr/pridictor/>).

1077

1078 **S1 Table. The proteins of NA cells identified by LC-MS from the**  
1079 **co-immunoprecipitation with NS3.**

1080

1081 **S2 Table. Primers used for quantification of IL-1 $\beta$  and components of RISC mRNA.**

1082

1083 **S3 Table. The reverse transcription primers used for reverse transcribed all mature**  
1084 **miRNA that were added with specific stem-loop structure at the end of 5'.**

1085

1086 **S4 Table. Primers used for quantification of pri-miRNA and pre-miRNA.**

1087

1088 **S5 Table. Primers used for quantification of mature miRNA and U6.**

1089

1 Fig 1.

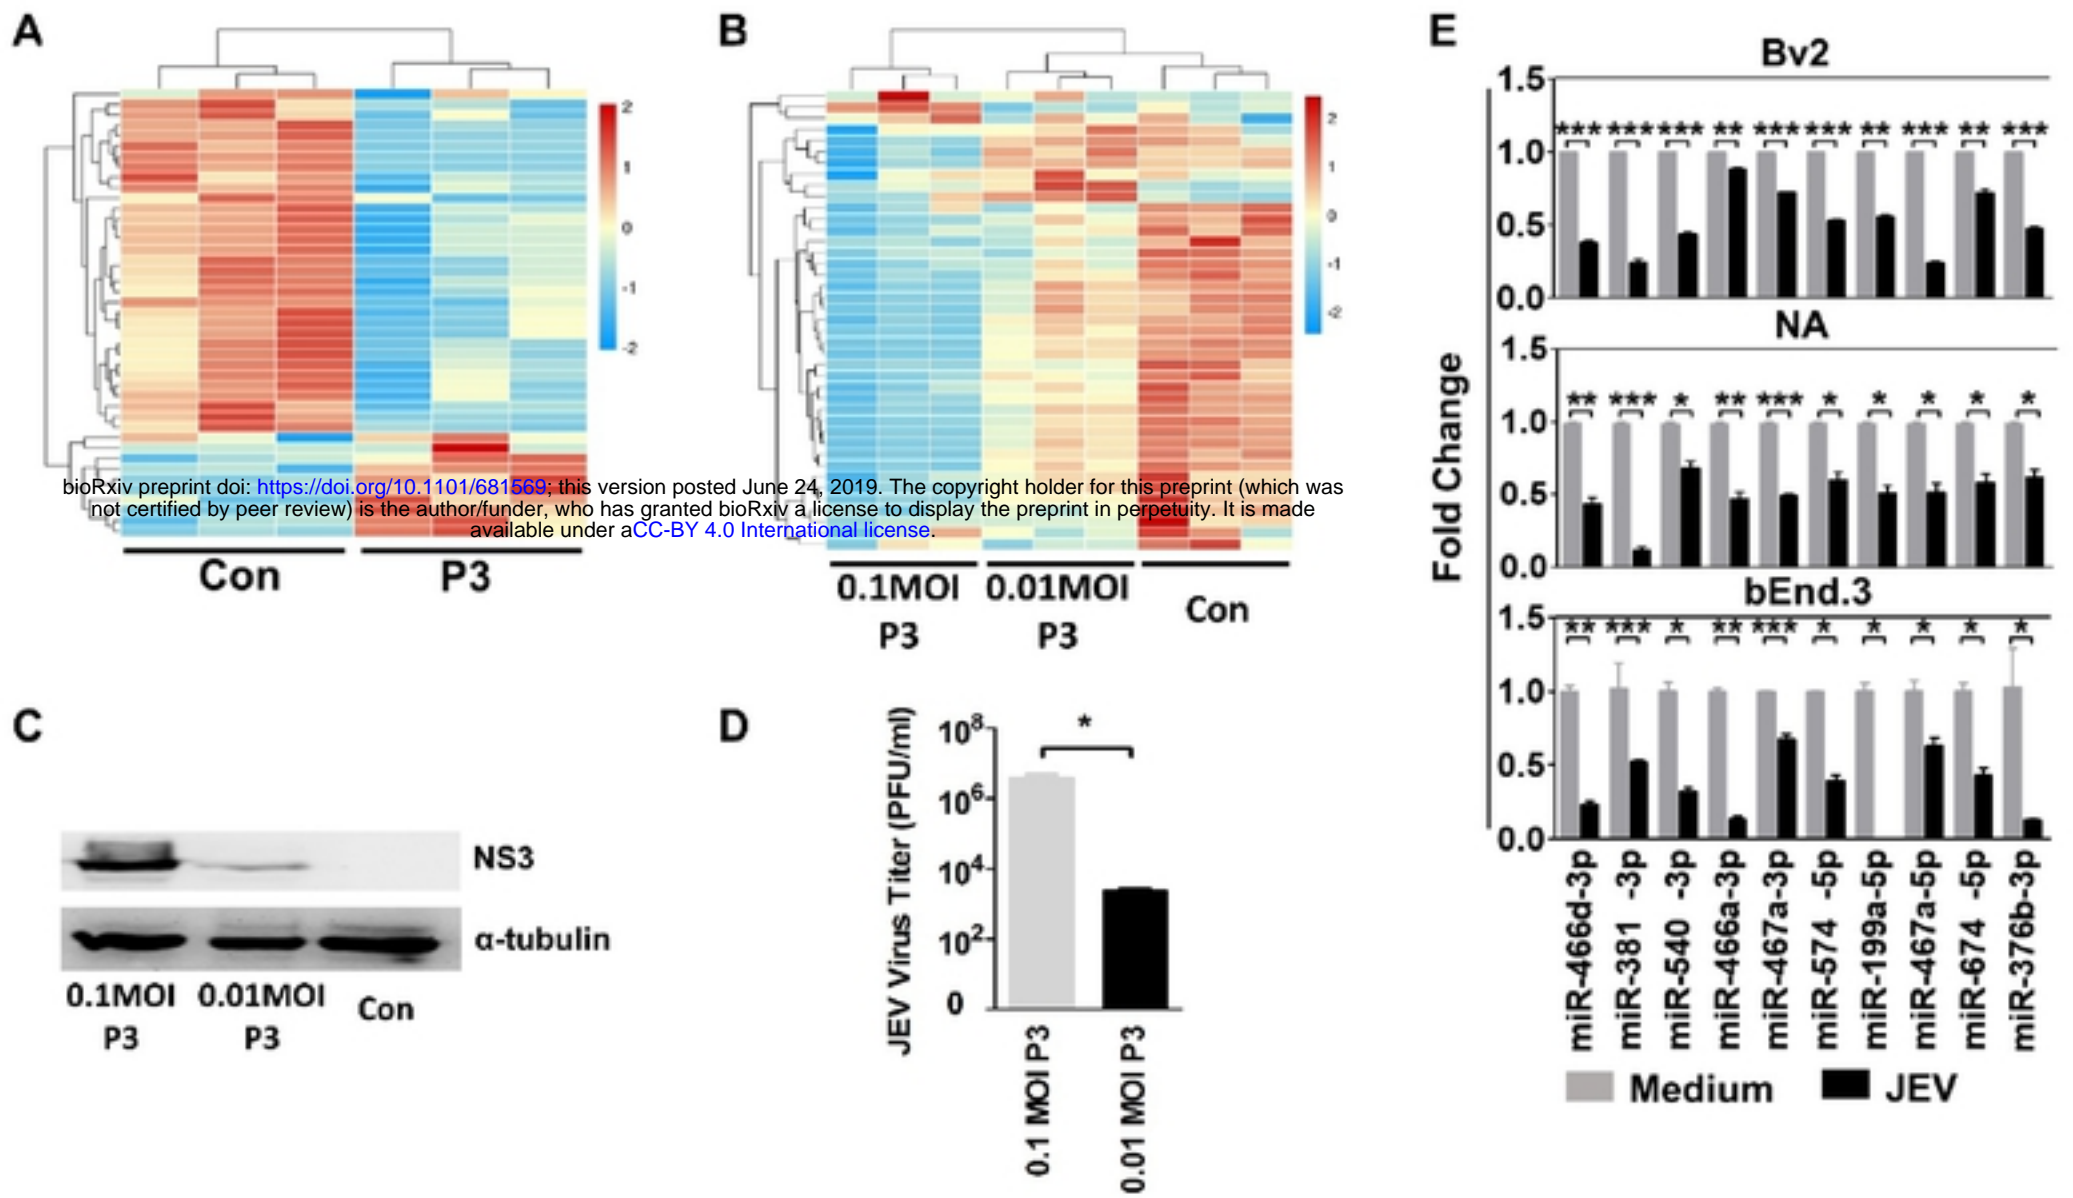

2

3

4 Fig 2.

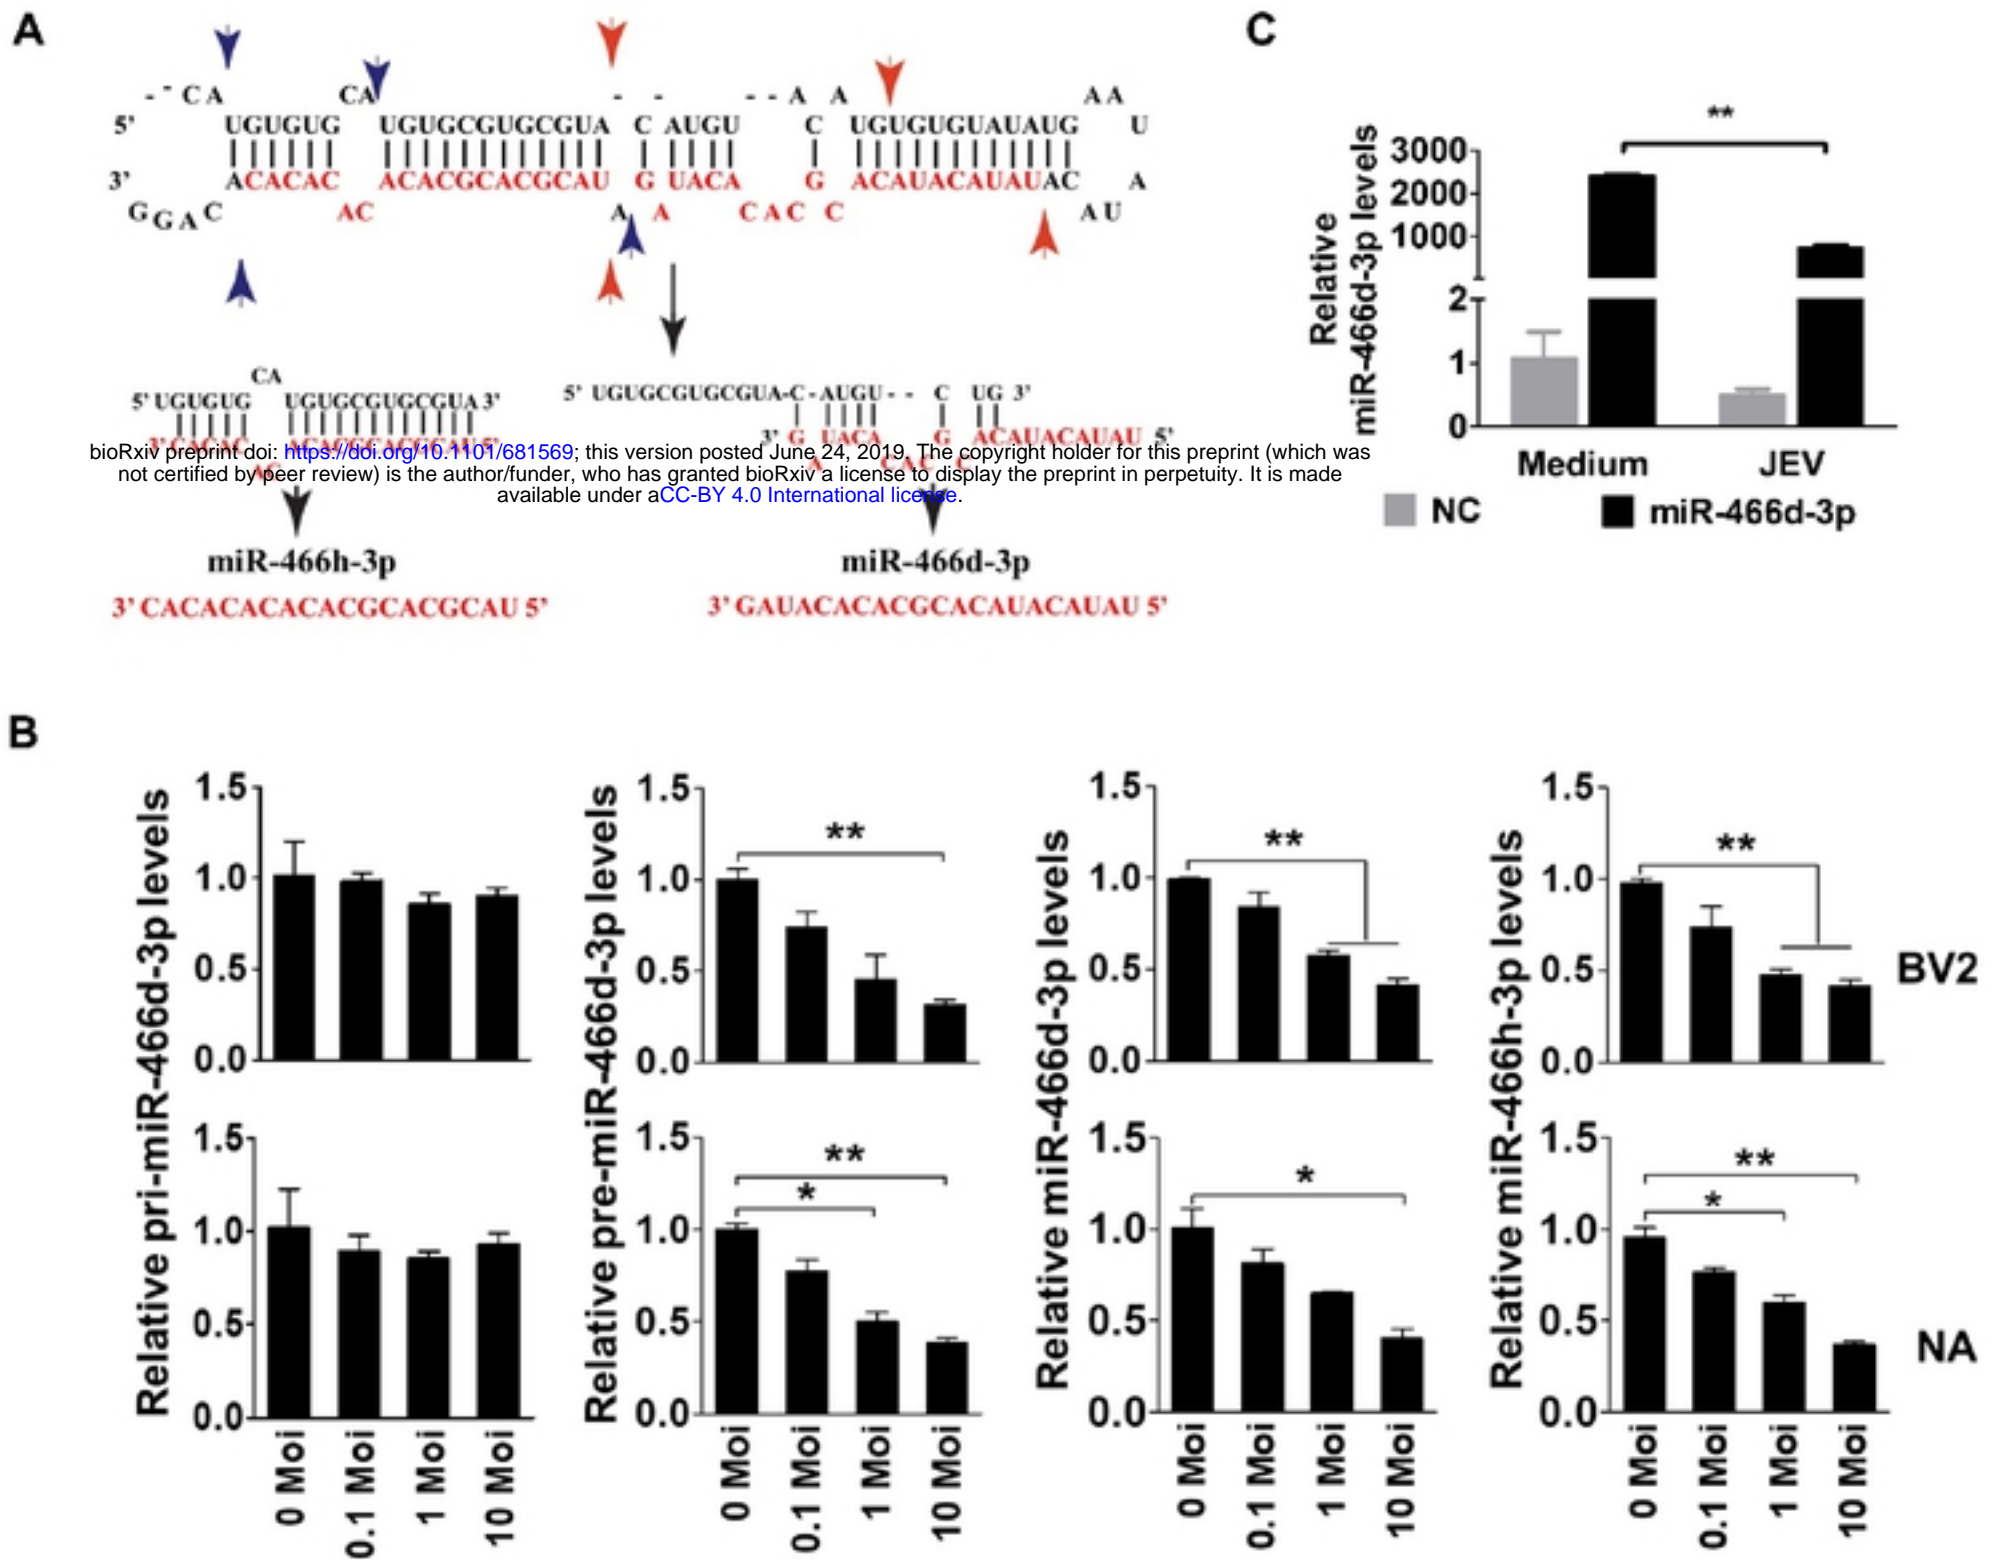

bioRxiv preprint doi: <https://doi.org/10.1101/681569>; this version posted June 24, 2019. The copyright holder for this preprint (which was not certified by peer review) is the author/funder, who has granted bioRxiv a license to display the preprint in perpetuity. It is made available under aCC-BY 4.0 International license.

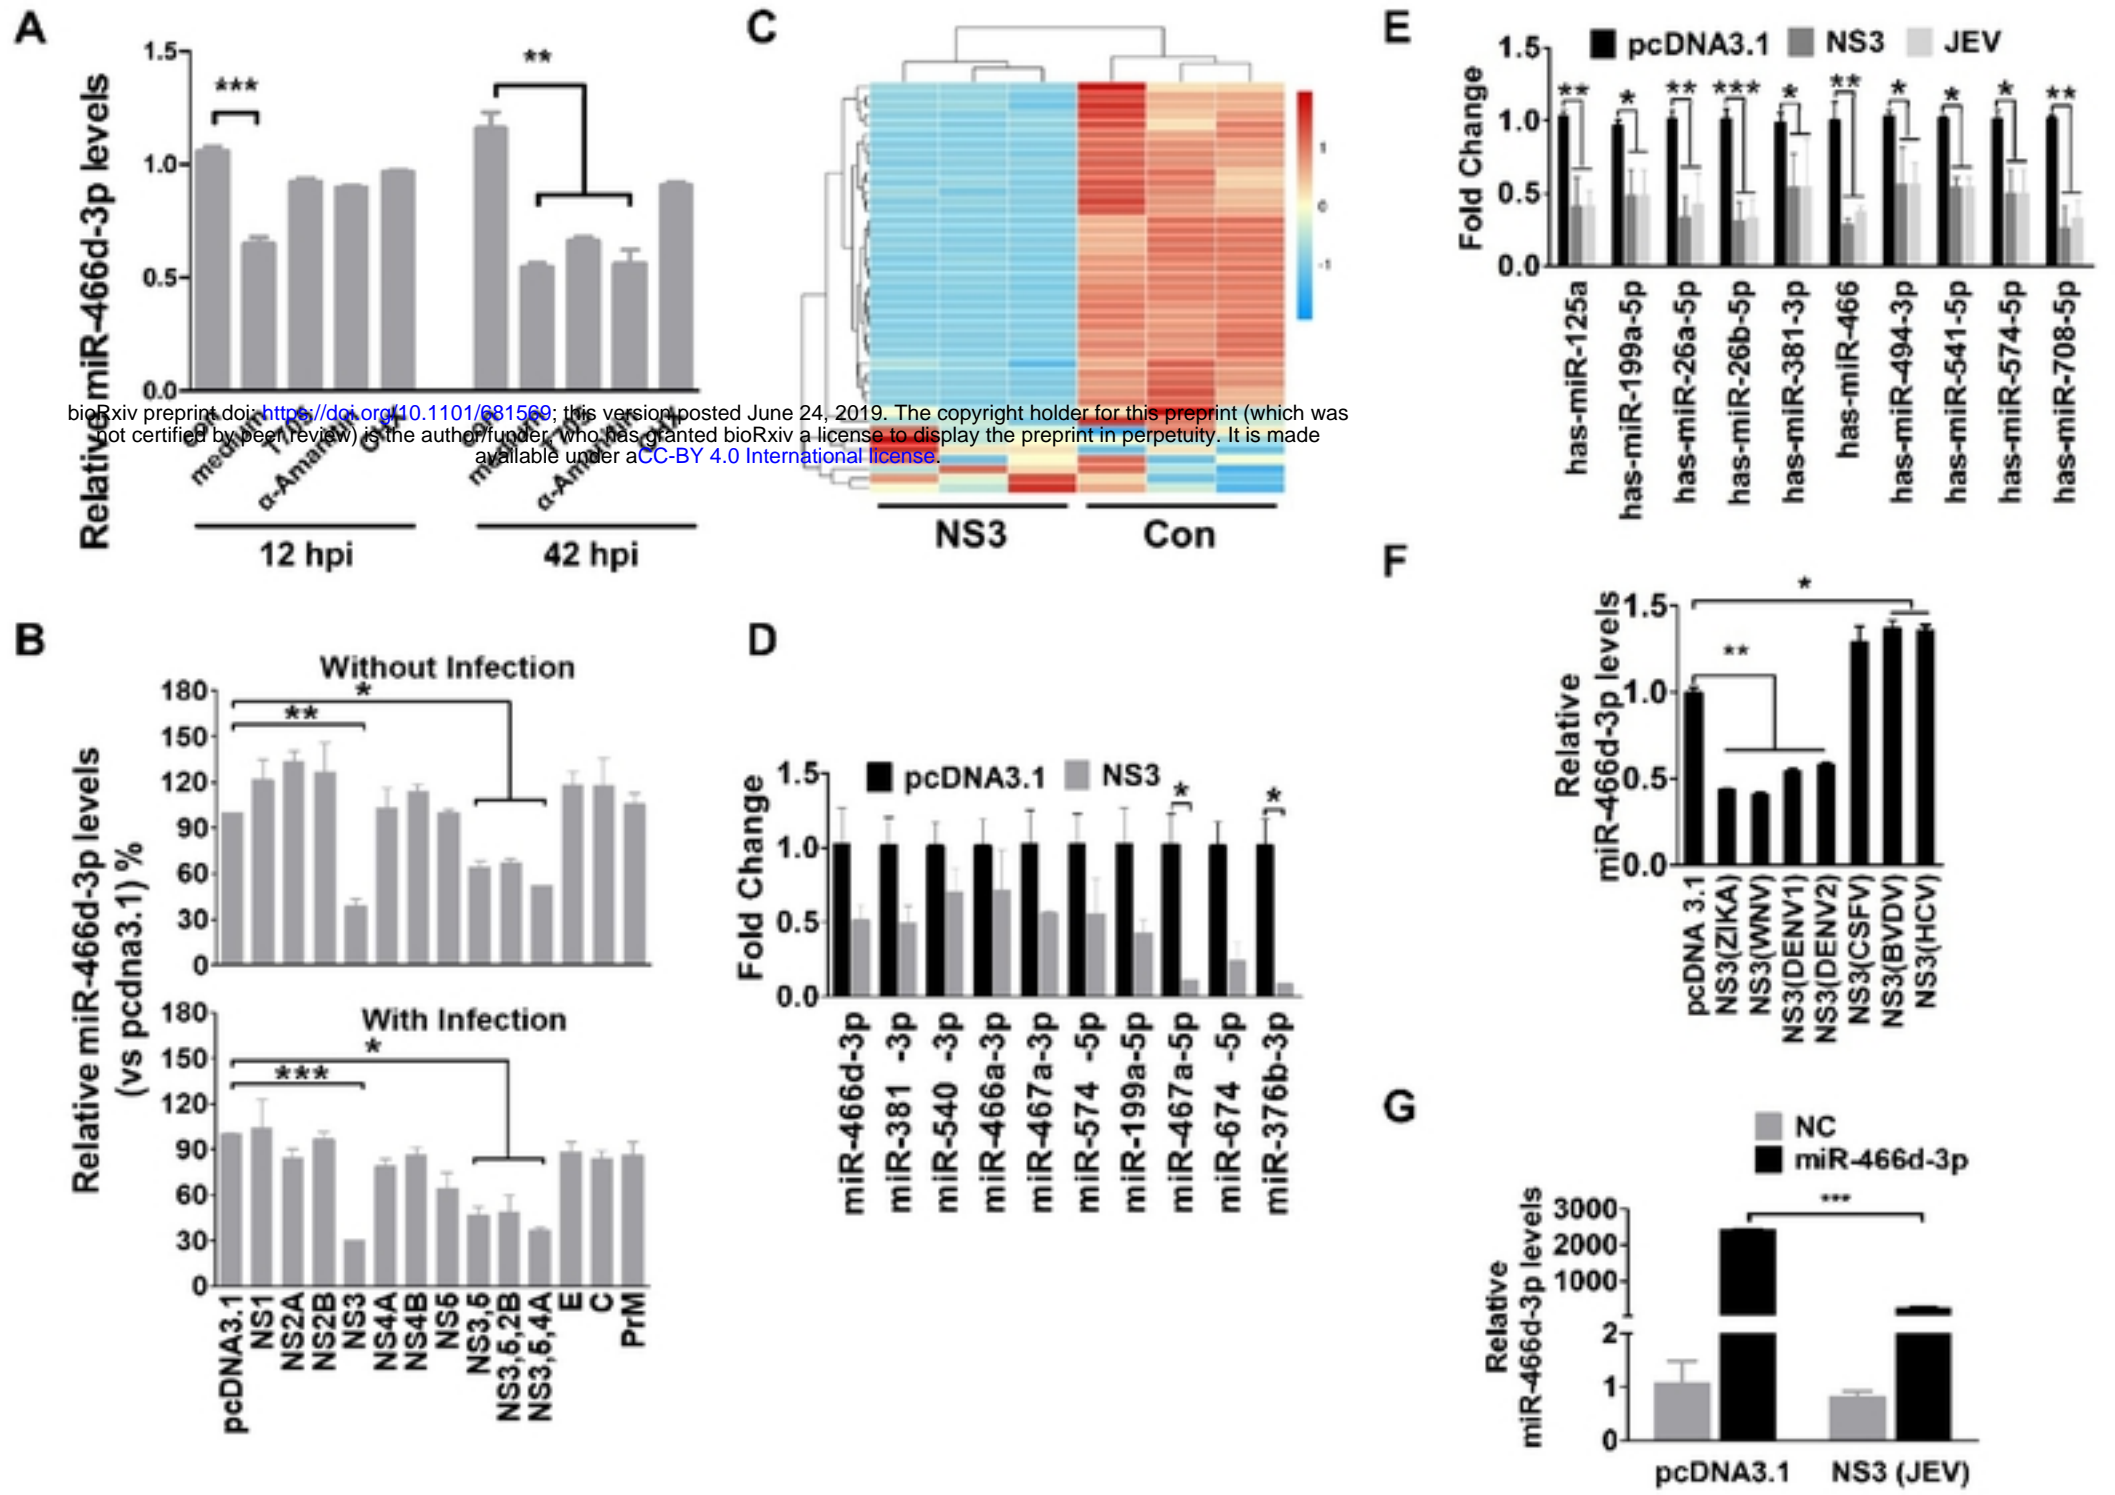

bioRxiv preprint doi: <https://doi.org/10.1101/681569>; this version posted June 24, 2019. The copyright holder for this preprint (which was not certified by peer review) is the author/funder, who has granted bioRxiv a license to display the preprint in perpetuity. It is made available under aCC-BY 4.0 International license.

8 Fig 4.

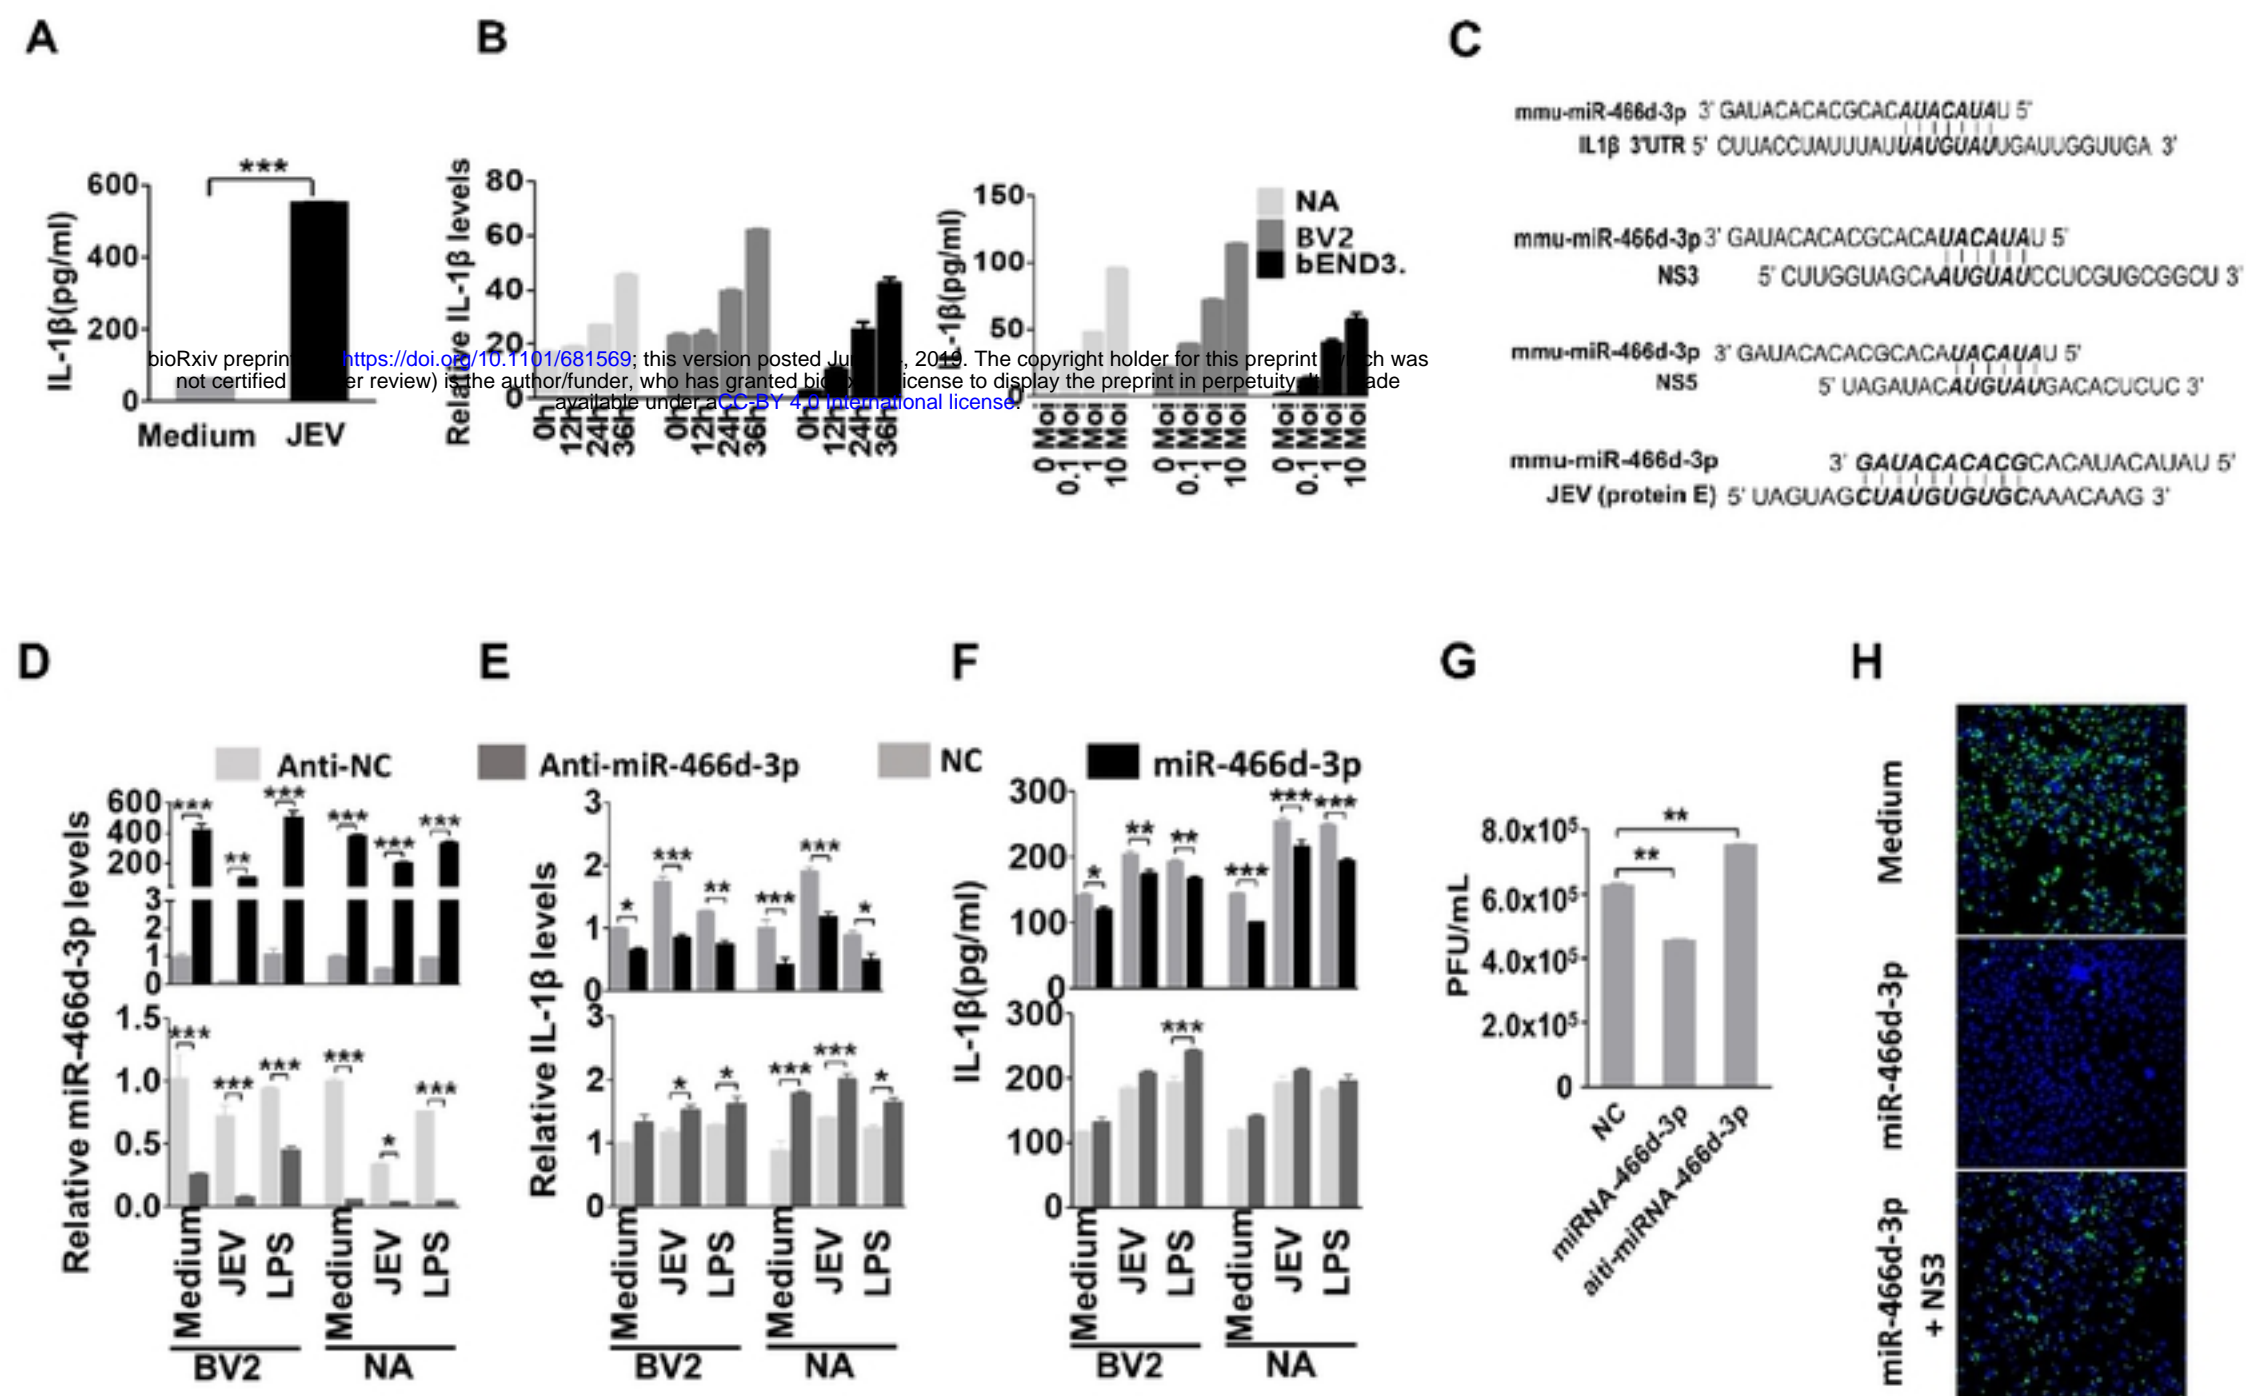

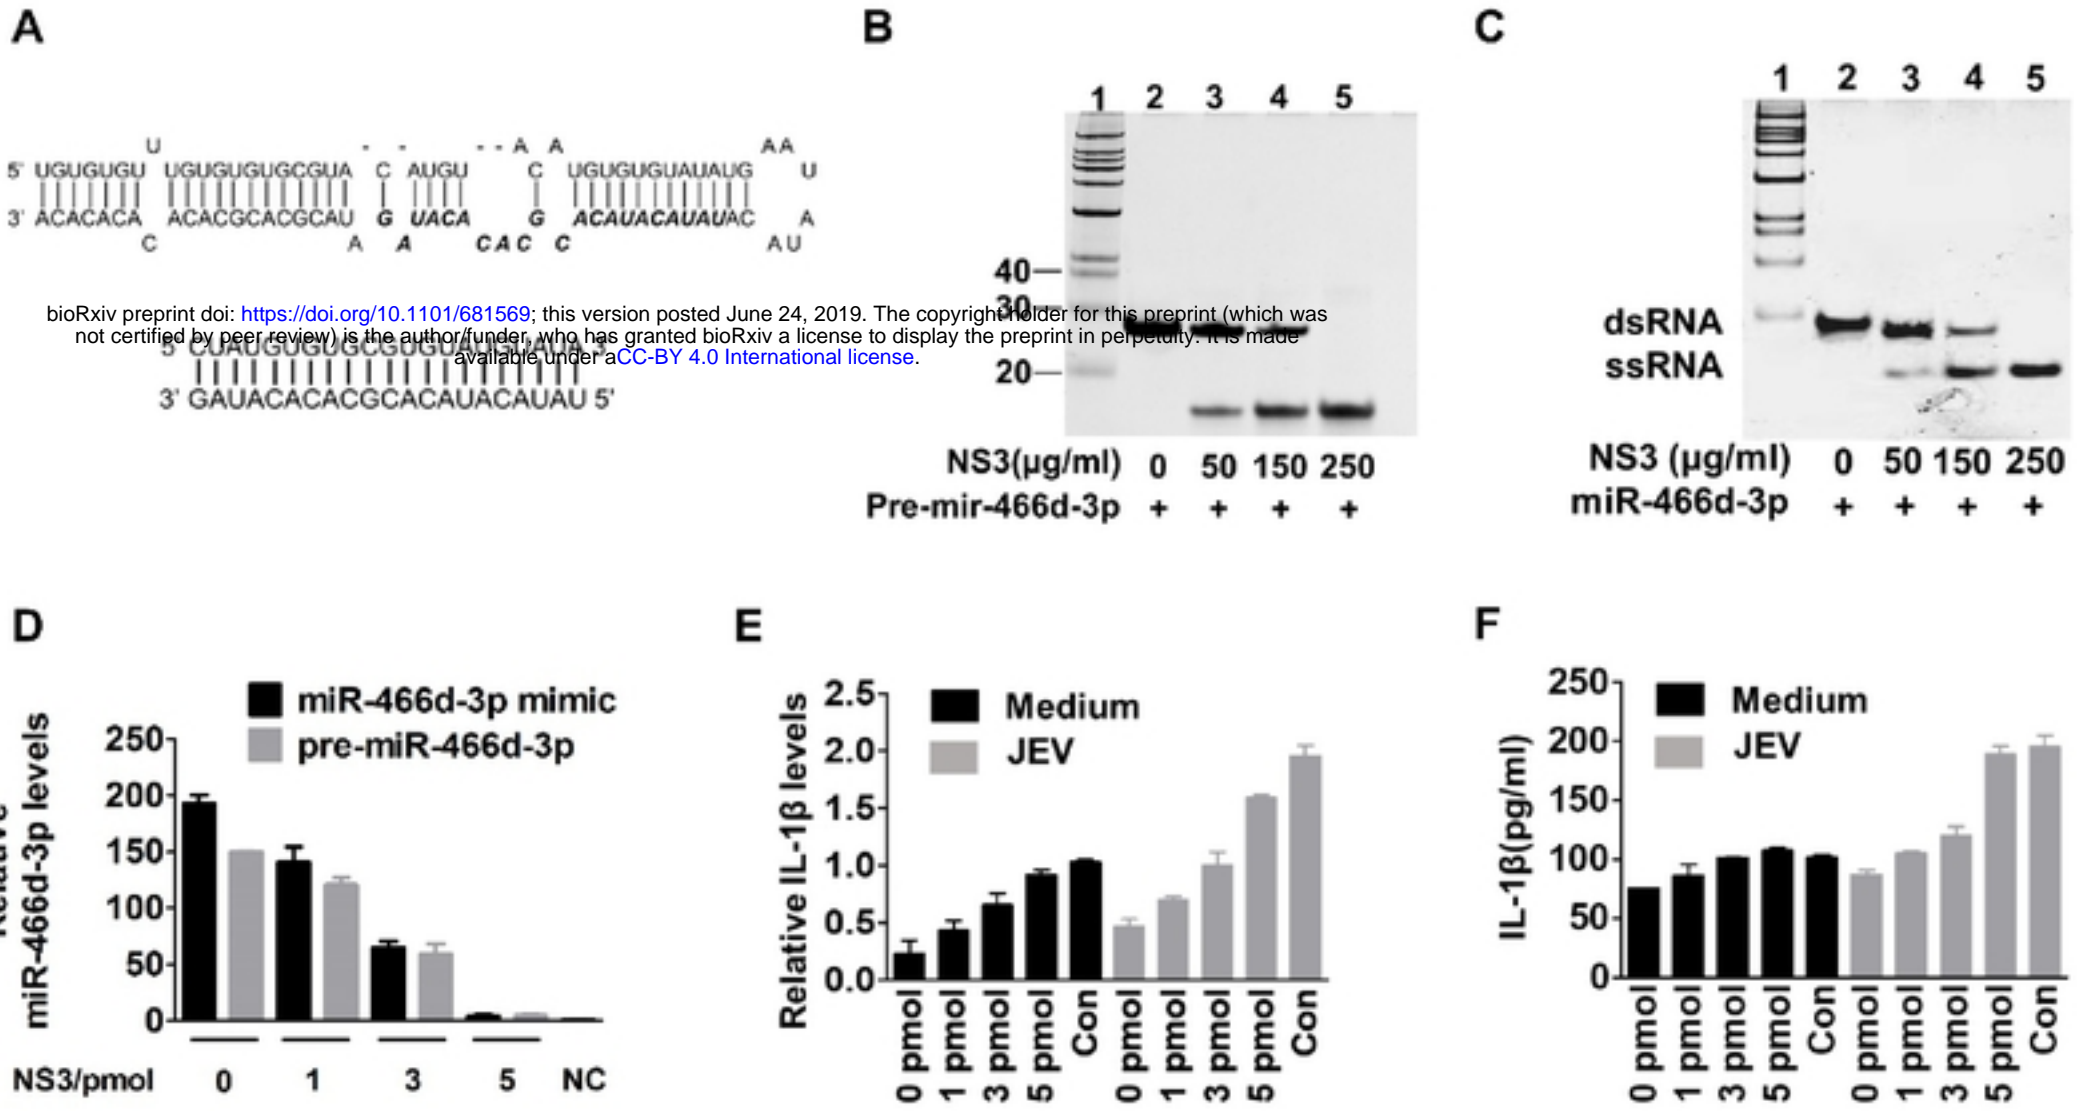

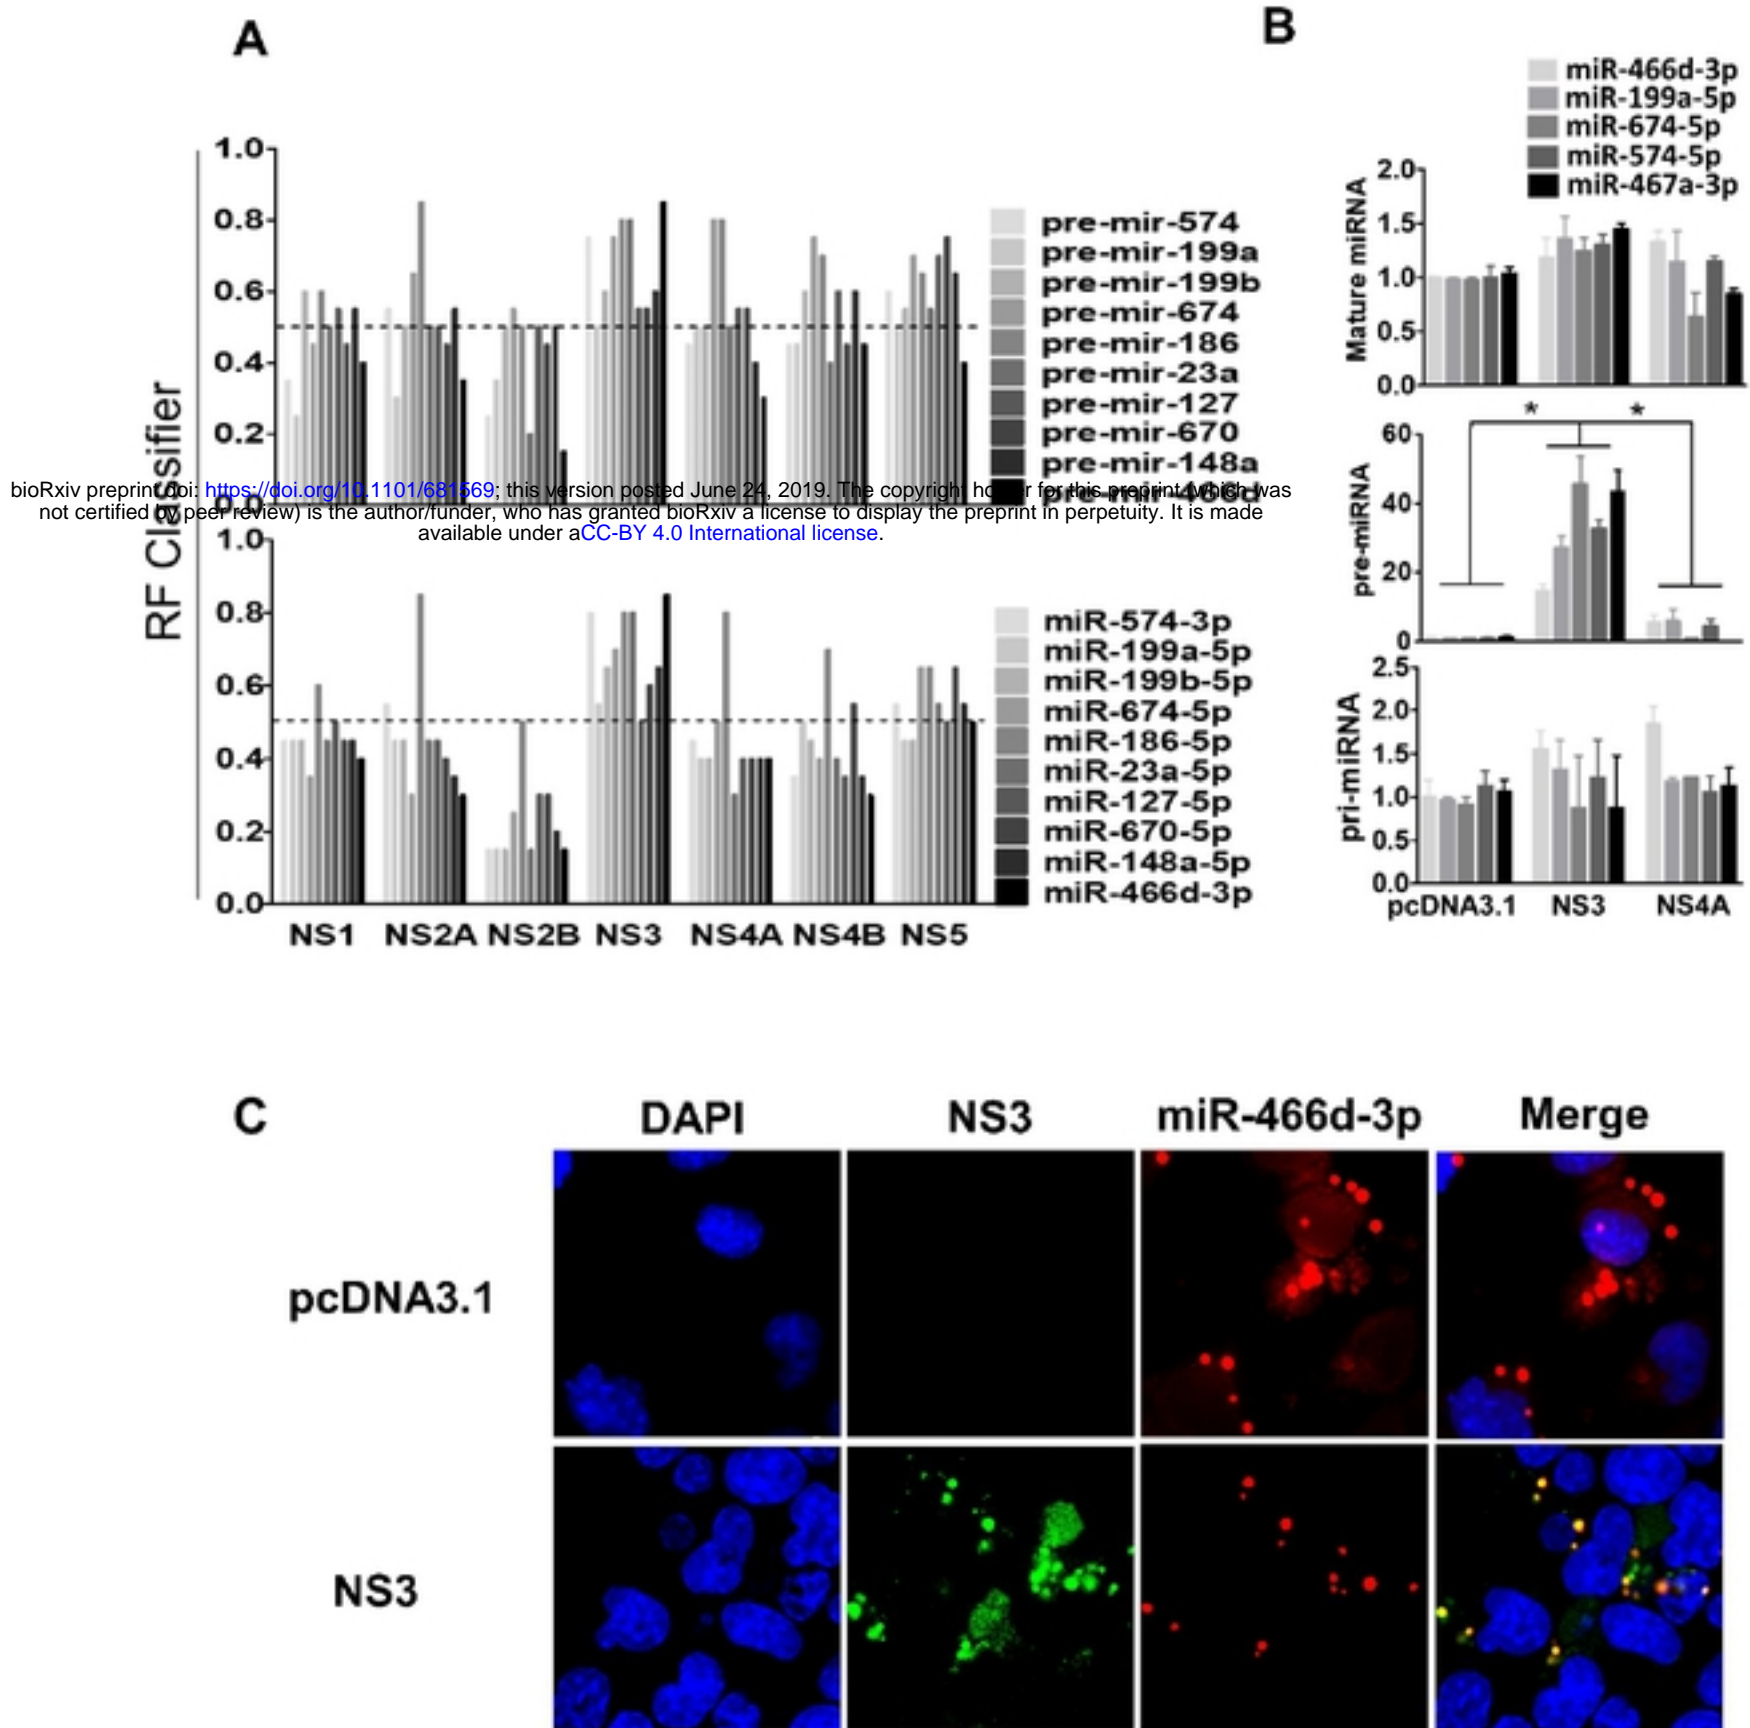

bioRxiv preprint doi: <https://doi.org/10.1101/681569>; this version posted June 24, 2019. The copyright holder for this preprint (which was not certified by peer review) is the author/funder, who has granted bioRxiv a license to display the preprint in perpetuity. It is made available under aCC-BY 4.0 International license.



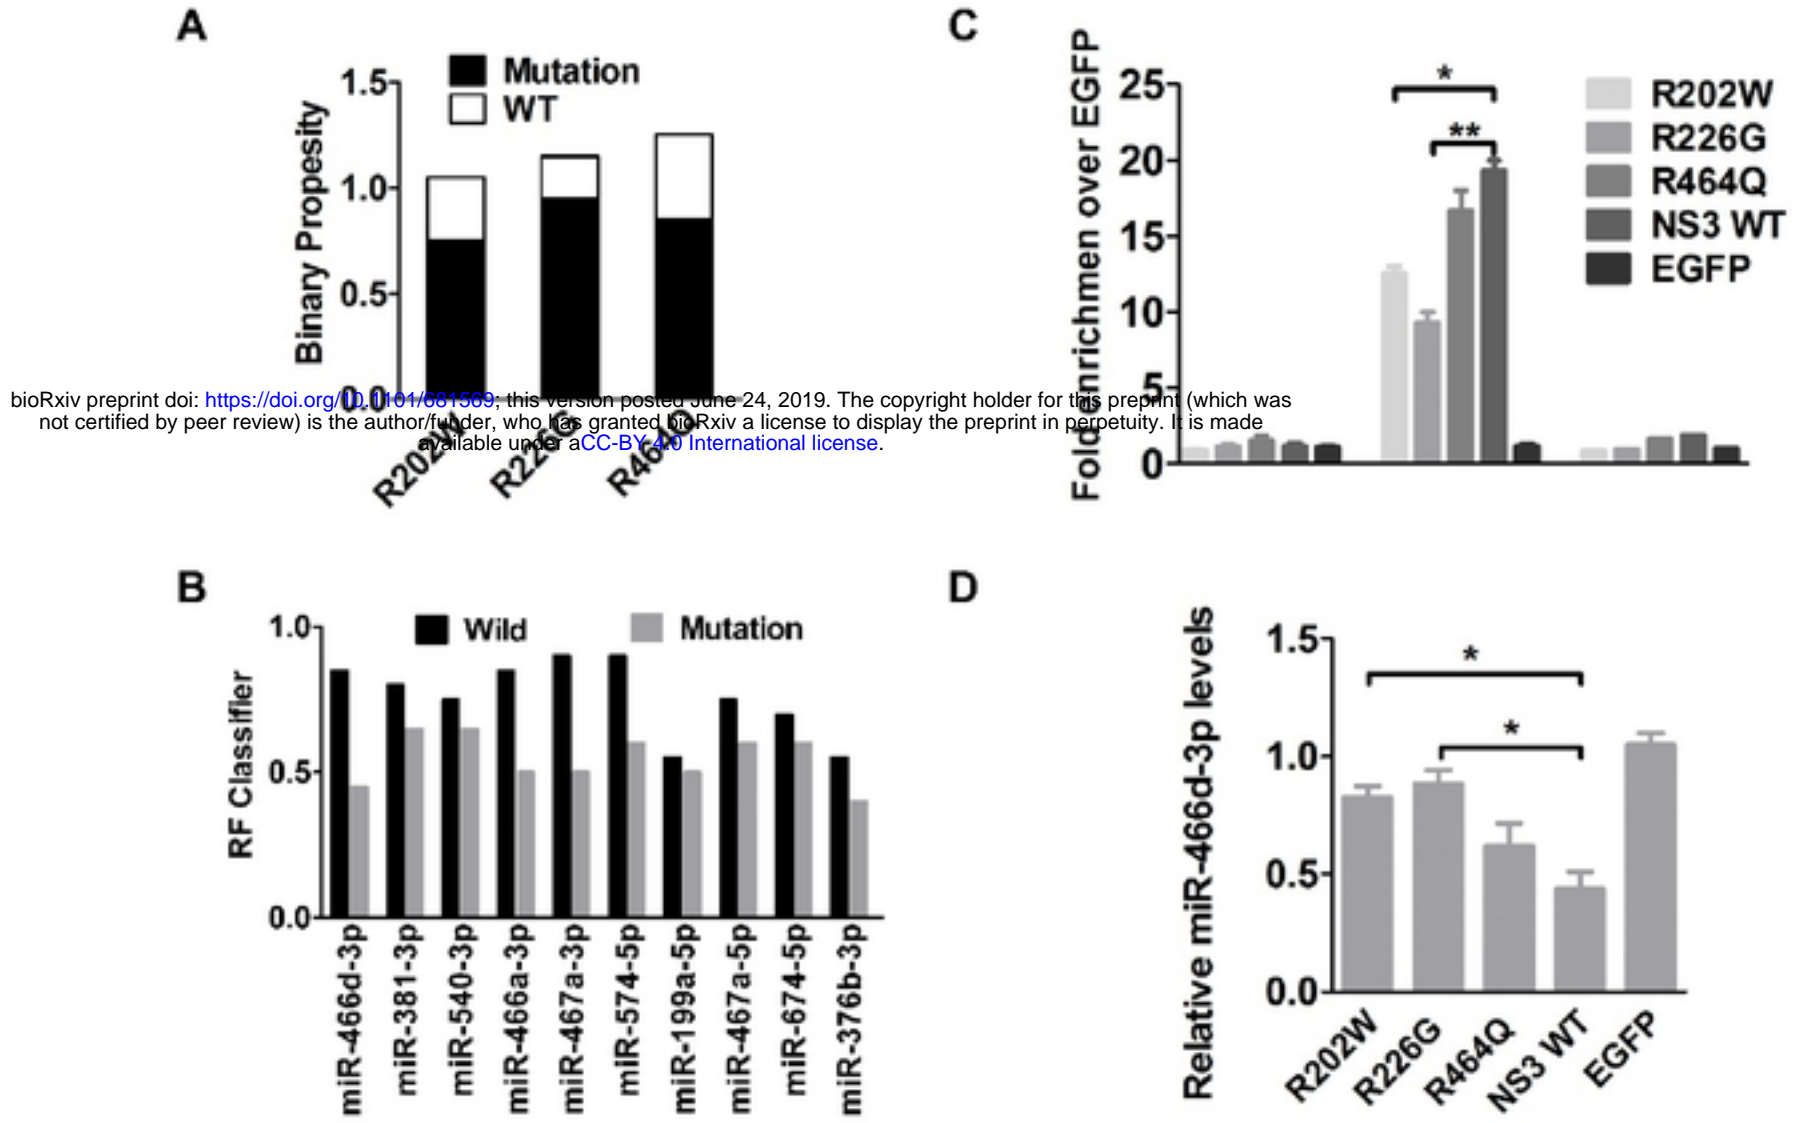

16

17

18
